1 **Metabarcoding lake sediments: taphonomy and representation of**  
2 **contemporary vegetation in environmental DNA (eDNA) records**

3  
4 Inger Greve Alsos<sup>1</sup>, Youri Lammers<sup>1</sup>, Nigel Giles Yoccoz<sup>2</sup>, Tina Jørgensen<sup>1</sup>, Per Sjögren<sup>1</sup>, Ludovic  
5 Gielly<sup>3,4</sup>, and Mary E. Edwards<sup>1,5</sup>

6  
7 <sup>1</sup>Tromsø Museum, University of Tromsø – The Arctic University of Norway, NO-9037 Tromsø,  
8 Norway

9  
10 <sup>2</sup>Department of Arctic and Marine Biology, University of Tromsø – The Arctic University of Norway,  
11 NO-9037 Tromsø, Norway

12  
13 <sup>3</sup>University Grenoble Alpes, LECA, F-38000 Grenoble, France

14  
15 <sup>4</sup>CNRS, LECA, F-38000 Grenoble, France

16  
17 <sup>5</sup>Geography and Environment, University of Southampton, Highfield, Southampton SO17 1BJ, UK.

18  
19 \*Corresponding author

20 Email: inger.g.alsos@uit.no

## 21 **Abstract**

22           Metabarcoding of lake sediments may reveal current and past biodiversity, but little is known  
23 about the degree to which taxa growing in the vegetation are represented in environmental DNA  
24 (eDNA) records. We analysed composition of lake and catchment vegetation and vascular plant eDNA  
25 at 11 lakes in northern Norway. Out of 489 records of taxa growing within 2 m from the lake shore,  
26 17-49% (mean 31%) of the identifiable taxa recorded were detected with eDNA. Of the 217 eDNA  
27 records, 73% and 12% matched taxa recorded in vegetation surveys within 2 m and up to about 50 m  
28 away from the lakeshore, respectively, whereas 16% were not recorded in the vegetation surveys of  
29 the same lake. The latter include taxa likely overlooked in the vegetation surveys or growing outside  
30 the survey area. The percentages detected were 61, 47, 25, and 15 for dominant, common, scattered,  
31 and rare taxa, respectively. Similar numbers for aquatic plants were 88, 88, 33 and 62%, respectively.  
32 Detection rate and taxonomic resolution varied among plant families and functional groups with good  
33 detection of e.g. Ericaceae, Roseaceae, deciduous trees, ferns, club mosses and aquatics. The  
34 representation of terrestrial taxa in eDNA depends on both their distance from the sampling site and  
35 their abundance and is sufficient for recording vegetation types. For aquatic vegetation, eDNA may be  
36 comparable with, or even superior to, in-lake vegetation surveys and therefore be used as an tool for  
37 biomonitoring. For reconstruction of terrestrial vegetation, technical improvements and more intensive  
38 sampling is needed to detect a higher proportion of rare taxa although DNA of some taxa may never  
39 reach the lake sediments due to taphonomical constrains. Nevertheless, eDNA performs similar to  
40 conventional methods of pollen and macrofossil analyses and may therefore be an important tool for  
41 reconstruction of past vegetation.

42

43

44

## 45 **Introduction**

46

47 Environmental DNA (eDNA), DNA obtained from environmental samples rather than tissue,  
48 is a potentially powerful tool in fields such as modern biodiversity assessment, environmental  
49 sciences, diet, medicine, archaeology, and paleoecology [1-4]. Its scope has been greatly enlarged by  
50 the emergence of metabarcoding: massive parallel next generation DNA sequencing for the  
51 simultaneous molecular identification of multiple taxa in a complex sample [5]. The advantages of  
52 metabarcoding in estimating species diversity are many. It is cost-effective, it has minimal effect on  
53 the environment during sampling, and data production (though not interpretation) is independent of the  
54 taxonomic expertise of the investigator [4, 6]. It may even out-perform traditional methods in the  
55 detection of individual species [7, 8]. Nevertheless, the discipline is still in its infancy, and we know  
56 little about the actual extent to which species diversity is represented in the eDNA records [9, 10].  
57 This study assesses representation of modern vegetation by eDNA from lake sediments.

58

59 DNA occurs predominantly within cells but is released to the environment upon cell  
60 membrane degradation [4]. It may then bind to sediment components such as refractory organic  
61 molecules or grains of quartz, feldspar and clay [11]. It can be detected after river transport over  
62 distances of nearly 10 km [9, 12]. When released into the environment, degradation increases  
63 exponentially [9, 13], so eDNA from more distant sources is likely to be of low concentrations in a  
64 given sample. Once in the environment, preservation ranges from weeks in temperate water, to  
65 hundreds of thousands years in dry, frozen sediment [4]. Preservation depends on factors such as  
66 temperature, pH, UV-B levels, and thus lake depth [14-16]. Even when present, many factors affect  
67 the probability of correct detection of species in environmental samples, for example: the quantity of  
68 DNA [8, 17], the DNA extraction and amplification method used [7, 18], PCR and sequencing errors,  
69 as well as the reference library and bioinformatics methods applied [4, 18-20]. If preservation  
70 conditions are good and the methods applied adequate, most or all species present may be identified

71 and the number of DNA reads may even reflect the biomass of species [6, 7, 21], making this a  
72 promising method for biodiversity monitoring.

73

74 When applied to late-Quaternary sediments, eDNA analysis may help disclose hitherto  
75 inaccessible information, thus providing promising new avenues of palaeoenvironmental  
76 reconstruction [22, 23]. Lake sediments are a major source of palaeoenvironmental information [24]  
77 and, given good preservation, DNA in lake sediments can provide information on biodiversity change  
78 over time [4, 22, 25]. However, sedimentary ancient DNA is still beset by authentication issues [2,  
79 10]. For example, the authenticity and source of DNA reported in several recent studies have been  
80 questioned [26-30]. As with pollen and macrofossils [31, 32], we need to understand the source of the  
81 DNA retrieved from lake sediments and know which portion of the flora is represented in DNA  
82 records.

83

84 The P6 loop of the plastid DNA *trnL* (UAA) intron [33] is the most widely applied marker for  
85 identification of vascular plants in environmental samples such as Pleistocene permafrost samples [34-  
86 36], late-Quaternary lake sediments [15, 22, 27, 37-41], sub-modern or modern lake sediments [42],  
87 animal faeces [43, 44], and sub-modern or modern soil samples [6, 45]. While some studies include  
88 comparator proxies to assess the ability of DNA to represent species diversity (e.g., [35, 41, 46, 47],  
89 only one study has explicitly tested how well the floristic composition of eDNA assemblages reflect  
90 the composition of extant plant communities [6], and similar tests are urgently needed for lake  
91 sediments. Yoccoz *et al.* found most common species and some rare species in the vegetation were  
92 represented in the soil eDNA at a subarctic site in northern Norway. The present study attempts a  
93 similar vegetation-DNA calibration in relation to lake sediments.

94

95 We retrieved sedimentary eDNA and recorded the vegetation at 11 lakes that represent a  
96 gradient from boreal to alpine vegetation types in northern Norway. We chose this area because DNA  
97 is best preserved in cold environments and because an almost complete reference library is available  
98 for the relevant DNA sequences for arctic and boreal taxa [34, 36]. Our aims were to 1) increase our

99 understanding of eDNA taphonomy by determining how abundance in vegetation and distance from  
100 lake shore affect the detection of taxa, and 2) examine variation in detection of DNA among lakes and  
101 taxa. Based on this, we discuss the potential of eDNA from lake sediments as a proxy for modern and  
102 past floristic richness.

103

104

## 105 **Materials and Methods**

### 106 **Study sites**

107 Eleven lakes were selected using the following criteria: 1) lakes size within the range of lakes  
108 studied for pollen in the region and with limited inflow and outflow streams; 2) a range of vegetation  
109 types from boreal forest to alpine heath was represented; and 3) lakes sediments are assumed to be  
110 undisturbed by human construction activity. Six of the lakes were selected also for the availability of  
111 pollen, macro and/or ancient DNA analyses [27, 48-52]. Data on catchment size, altitude, yearly mean  
112 temperature, mean summer temperature and yearly precipitation were gathered using NEVINA  
113 (<http://nevina.nve.no/>) from the Norwegian Water Resources and Energy Directorate (NVE,  
114 <https://www.nve.no>). Lake size was calculated using <http://www.norgebilder.no/>. Number and size of  
115 inlets and outlets were noted during fieldwork.

116

117 **Fig 1. Study lakes in northern Norway.** a) A-tjern, b) Brennskogtjørna, c) Einletvatnet, d)  
118 Finnvatnet, e) Gaupjern, f) Jula Jävri, g) Lakselvhogda, h) Lauvås, i) Øvre Æråsvatnet, j) Paulan  
119 Jávri, k) Rottjern, l) Tina Jørgensen sampling surface sediments with Kajak corer. Photo: I.G. Alsos.

120

121

## 122 **Vegetation surveys**

123           We attempted to record all species growing within 2 m from the lakeshore. This was a  
124 practically achievable survey, and data are comparable among sites. Aquatics were surveyed from the  
125 boat using a “water binocular” and a long-handled rake, while rowing all around smaller lakes and at  
126 least half way around the three largest lakes. We also surveyed a larger part of the catchment  
127 vegetation. For this, we used aerial photos (<http://www.norgebilder.no>) to identify polygons of  
128 relatively homogeneous vegetation (including the area within 2 m). In the field we surveyed each  
129 polygon and classified observed species as rare (only a few ramets), scattered (ramets occur  
130 throughout but at low abundance), common, or dominant. The area covered and intensity of these  
131 broad-scale vegetation surveys varied among lakes due to heterogeneity of the vegetation, catchment  
132 size and time constraints. They mainly represent the vegetation within 50 m of the lakeshore. Sites  
133 were revisited several times during the growing season to increase the detection rate. For each lake our  
134 dataset consisted of a taxon list for 1) the <2-m survey, 2) the extended survey consisting of  
135 observations from <2 m and the polygons, 3) an abundance score based on the highest abundance  
136 score from any polygon at that lake. Taxonomy follows [53, 54].

137

## 138 **Sampling lake sediments**

139           Surface sediments were collected from the centres of the lakes between September 21<sup>st</sup> and  
140 October 1<sup>st</sup>, 2012, using a Kajak corer (mini gravity corer) modified to hold three core tubes spaced 15  
141 cm apart, each with a diameter of 3 cm and a length of 63 cm (Fig 1, Table 1). The core tubes were  
142 washed in Deconex®22 LIQ-x and bleached prior to each sampling. The top 8 cm sediments were  
143 extruded in field. Samples of ca. 25 mL were taken in 2-cm increments and placed in 50-ml falcon  
144 tubes using a sterilized spoon. All samples were frozen until extraction.

145

**Table 1. Characteristics of lakes where vegetation surveys and lake sediment DNA analyses were performed.**

| Lakes                   | District     | Habitat type                                  | Catchment area (km <sup>2</sup> ) | Alt. (m a.s.l.) | Lake size (ha) | Water depth (m) | Yearly mean (°C) | Summer mean (°C) | Yearly prec. (mm) | Inlets    | N lat. | E lat. |
|-------------------------|--------------|-----------------------------------------------|-----------------------------------|-----------------|----------------|-----------------|------------------|------------------|-------------------|-----------|--------|--------|
| A-tjern <sup>a</sup>    | Dividalen    | Mixed forest/mire, tall herbs                 | 0.17                              | 125             | 1.70           | 5.5             | -0.8             | 6.9              | 636               | 3         | 68.996 | 19.486 |
| Brennskogtjønnna        | Dividalen    | Pine forest, heath                            | 1.20                              | 311             | 10.64          | 20.0            | -0.9             | 6.4              | 457               | 2         | 68.859 | 19.594 |
| Einletvatnet            | Andøya       | Mires, patches of birch forest                | 1.26                              | 35              | 27.00          | 4 (6.7)         | 3.7              | 8.8              | 1025              | 5 minor   | 69.258 | 16.071 |
| Finnvatnet              | Kvaløya      | Birch forest/mire                             | 0.20                              | 158             | 0.86           | 2.0             | 2.7              | 7.9              | 1005              | 3-4 minor | 69.778 | 18.612 |
| Gauptjern               | Dividalen    | Sub-alpine mixed forest, tall and low herbs   | 0.07                              | 400             | 0.79           | 4.0             | -0.9             | 6.5              | 451               | 2         | 68.856 | 19.618 |
| Jula Jávri <sup>c</sup> | Kåfjorddalen | Alpine heath and mire                         | 1.05                              | 791             | 0.04           | 1.7             | -3.6             | 3.9              | 670               | 2-5 minor | 69.365 | 21.099 |
| Lakselvhøgda            | Ringvassøya  | Alpine heath and mire, scattered birch forest | 0.06                              | 143             | 0.77           | 2.0             | 2.5              | 7.2              | 977               | 0         | 69.927 | 18.846 |
| Lauvås                  | Ringvassøya  | Heath, mire and mesic herb birch forest       | 0.41                              | 4               | 0.71           | 3.3             | 2.7              | 7.5              | 971               | 2         | 69.946 | 18.860 |
| Øvre Æråsvatnet         | Andøya       | Mires and birch forest, conifers planted      | 3.60                              | 43              | 24.00          | 9.5             | 3.4              | 8.3              | 1027              | 3         | 69.256 | 16.034 |
| Paulan Jávri            | Kåfjorddalen | Alpine heath                                  | 0.56                              | 746             | 0.22           | 2.0             | -3.7             | 3.7              | 662               | 1+1 minor | 69.399 | 21.015 |
| Rottjern <sup>b</sup>   | Dividalen    | Mixed forest, tall herbs                      | 0.96                              | 126             | 1.91           | 3.0             | -0.3             | 7.6              | 619               | 2         | 68.983 | 19.477 |

All lakes are in northern Norway. Water depth given for sampling site in the centre of the lake; deepest point in brackets if different. “Summer” is May-September, “Alt.” is altitude, “prec.” is precipitation, and “N lat.” and “E. lat.” are northern and eastern latitude, respectively. Mixed forest is forest dominated by birch but with some Pine.

<sup>a,b</sup>Named A-tjern and B-tjern in Jensen& Vorren 2008. B-tjern later official named Rottjern. A-tjern named “Vesltjønnna” on NEVINA but this name is not official.

<sup>c</sup>Catchment area could not be calculated using NEVINA so this was done in <http://norgeskart.no>. Temperature and precipitation data were taken from the nearby Goulassaiva.

147

148



## 149 **DNA extraction and amplification**

150 For each lake, we analysed the top 0-2 cm of sediment separately from two of the three core  
151 tubes (n=22). Twenty extra samples from lower in the cores were also analysed. The main down-core  
152 results will be presented in a separate paper in which we compare eDNA records with the pollen  
153 analyses by [49]. Taxa that were only identified from lower levels in the cores are noted in S1 Table.  
154 Samples were thawed in a refrigerator over 24-48 hours, and 4-10 g were subsampled for DNA. The  
155 42 samples and 6 negative controls underwent extraction at the Department for Medical Biology,  
156 University of Tromsø, in a room where no previous plant DNA work had been done. A PowerMax  
157 Soil DNA Isolation kit (MO BIO Laboratories, Carlsbad, CA, USA) was used following the  
158 manufacturer's instructions, with water bath at 60°C and vortexing for 40 min.

159

160 All PCRs were performed at LECA (Laboratoire d'ECologie Alpine, University Grenoble  
161 Alpes), using the *g* and *h* universal plant primers for the short and variable P6 loop region of the  
162 chloroplast *trnL* (UAA) intron [33]. Primers include a unique flanking sequence of 8 bp at the 5' end  
163 (tag, each primer pair having the same tag) to allow parallel sequencing of multiple samples [55, 56].  
164 PCR and sequencing on an Illumina 2500 HiSeq sequencing platform follows [41], using six PCR  
165 negative controls and two positive controls, and six different PCR replicates for each of the 56  
166 samples, giving a total of 336 PCR samples, of which 216 represent the upper 0-2 cm.

167

## 168 **DNA sequences analysis and filtering**

169 Initial filtering steps were done using OBITools [57] following the same criteria as in [41, 42]  
170 (S2 Table). We then used *ecotag* program [57] to assign the sequences to taxa by comparing them  
171 against a local taxonomic reference library containing 2445 sequences of 815 arctic [34] and 835  
172 boreal [36] vascular plant taxa; the library also contained 455 bryophytes [44]. We also made  
173 comparisons with a second reference library generated after running *ecopcr* on the global EMBL  
174 database (release r117 from October 2013). Only sequences with 100% match to a reference sequence

175 were kept. We excluded sequences matching bryophytes as we did not include them in the vegetation  
176 surveys. We used BLAST (Basic Local Alignment Search Tool) (<http://www.ncbi.nlm.nih.gov/blast/>)  
177 to check for potential wrong assignments of sequences.

178

179         When filtering next-generation sequencing data, there is a trade-off between losing true  
180 positives (TP, sequences present in the samples and correctly identified) and retaining false positives  
181 (FP, sequences that originate from contamination, PCR or sequencing artefacts, or wrong match to  
182 database) [17, 20, 58]. We therefore assessed the number of TP and FP when applying different last  
183 step filtering criteria. We initially used two spatial levels of comparison with the DNA results: i) data  
184 from our vegetation surveys and ii) the regional flora (i.e., species in the county of Nordland and  
185 Troms as listed by the Norwegian Bioinformation Centre (<http://www.biodiversity.no/>)). For any lake,  
186 both datasets are likely incomplete, as inconspicuous species may be lacking in the regional records  
187 [59] and our vegetation surveys did not include the entire catchment area. Nevertheless, the exercise is  
188 useful for evaluating how many FPs and TPs are lost by applying different filtering criteria. We  
189 defined true positives as sequences that matched a species recorded in the vegetation surveys at the  
190 same lake, being aware that this is an under-representation, as the vegetation surveys likely missed  
191 species. We defined false positives as species recorded neither in the vegetation surveys nor the  
192 regional flora. We tested the effect of different rules of sequence removal: 1) found as  $\leq 1, \leq 5$  or  $\leq 10$   
193 reads in a PCR repeat, 2) found as  $\leq 1, \leq 2$  or  $\leq 3$  PCR repeats for a lake sample, 3) occurring in more  
194 than one of 72 negative control PCR replicates, 4) on average, higher number of PCR repeats in  
195 negative controls than in sample, and 5) on average a higher number of reads in negative controls than  
196 in samples (S2 Table). The filtering criteria resulting in overall highest number of true positives kept  
197 compared to false positives lost were applied to all lakes. These were removing sequences with less  
198 than 10 reads, less than 2 PCR repeats in lake samples, and on average a lower number of reads in lake  
199 samples than in negative controls.

200

## 201 **Data analyses and statistics**

202           After data filtering, we compared taxon assemblages from DNA amplifications with the taxa  
203 recorded in the vegetation surveys. To make this comparison, taxa in the vegetation surveys were  
204 lumped according to the taxonomic resolution of the P6 loop (S1 Table), and the comparison was done  
205 at the lowest resultant taxonomic level. The majority of results explore only present/absence (taxa  
206 richness); quantitative data are given in tables (including Supporting Information).

207

208           Multivariate ordinations (Correspondence Analysis and Non-symmetric Correspondence  
209 Analysis, the latter giving more weight to abundant species; [60, 61], were run independently on the  
210 vegetation data (present/absent using only taxa recorded within 2m) and eDNA data (present/absent).  
211 The similarity between ordinations of vegetation and eDNA data was assessed using Procrustes  
212 analysis [62], as implemented in the functions `procrustes()` and `protest()` in R library `vegan` [63].

213

214           To estimate the percentages of false negatives and positives in the DNA data and in the  
215 vegetation survey, we used the approach described in [64]. If we define the probability of a DNA false  
216 positive as  $p_{DNA_0}$ , the detectability by DNA as  $p_{DNA_1}$ , the detectability in the vegetation survey as  
217  $p_{VEG_1}$ , and the probability that a species is present as  $p_{OCC}$ , we can state that the four probabilities of  
218 observing Presence(1)/Absence(0) in the DNA and Vegetation are as follows:

219

220 1.  $Prob(DNA=0, Vegetation=0) = (1 - p_{OCC})(1 - p_{DNA_0}) + p_{OCC}(1 - p_{DNA_1})(1 - p_{VEG_1})$

221 In this case, if the species is absent in both the DNA and vegetation, it is either absent with probability  
222  $(1 - p_{OCC})$  and no false positive has occurred with probability  $(1 - p_{DNA_0})$ , or it is present with  
223 probability  $p_{OCC}$ , but was not detected both in the DNA with probability  $(1 - p_{DNA_1})$  and in the  
224 vegetation with probability  $(1 - p_{VEG_1})$ .

225

226 2.  $Prob(DNA=0, Vegetation=1) = p_{OCC}(1 - p_{DNA_1})p_{VEG_1}$

227 In this case, the species is present, not detected in DNA but detected in the vegetation survey.

228

229  $3. Prob(DNA=1, Vegetation=0) = (1 - p_{OCC}) p_{DNA_0} + p_{OCC} p_{DNA_1} (1 - p_{VEG_1})$

230 In this case, the species is either absent and is a false DNA positive, or is present, detected by DNA  
231 but not in the vegetation survey.

232

233  $4. Prob(DNA=1, Vegetation=1) = p_{OCC} p_{DNA_1} p_{VEG_1}$

234 In this case, the species is present and is detected both in the DNA and the vegetation survey.

235

236 We assumed the four probabilities varied only among lakes, not among species. We also  
237 restricted the analyses to species that were detected at least once using DNA, because for species that  
238 were never detected using eDNA, different processes might be important. For  $p_{DNA_1}$ , we also  
239 considered a model assuming a logistic relationship between  $p_{DNA_1}$  and lake characteristics, such as  
240 lake depth or catchment area, that is:  $\text{logit}(p_{DNA_1}) = b_0 + b_1 \text{Lake Covariate}$ . We fitted these models  
241 using Bayesian methods, using uninformative priors (uniform distributions on the [0,1] interval) for  
242 the false positive/negative rates for DNA, and an informative prior for the detectability in the  
243 vegetation survey (uniform prior on the [0.8,1] interval, as detectability was high in the vegetation  
244 survey, but we had no repeated surveys or time to detection available to estimate it). We used the R  
245 package rjags to run the MCMC simulations [64]. Model convergence was assessed using the Gelman-  
246 Rubin statistics [65], values of which were all  $\sim 1.0$ .

247

## 248 **Results**

### 249 **Vegetation records**

250 The vegetation surveys provided 2316 observations of 268 taxa, including hybrids, subspecies,  
251 and uncertain identifications. Of these, 97 taxa share sequences with one or more other taxa (e.g., 20  
252 taxa of *Carex* and 15 of *Salix*). Another nine taxa were not in the reference library (e.g. *Cicerbita*

253 *alpina*), and eight taxa could not be matched due to incomplete identification in the vegetation survey.  
254 Eight taxa of *Equisetum* were filtered out due to short sequence length. This left 171 taxa that could  
255 potentially be recognized by the technique we used (S1 Table). For the 11 sites, between 31 and 58  
256 taxa were potentially identifiable (Table 2), and this value was positively correlated with vegetation  
257 species richness ( $y=0.67x+10.3$ ,  $r^2=0.93$ ,  $p<0.0001$ ,  $n=11$ ). Taxonomic resolution at species level was  
258 77-93% (mean 88) and 65-79 (mean 74%) for the <2 m and extended (i.e., combined) vegetation  
259 surveys, respectively.

260 Table 2. Number of records in vegetation and eDNA per lake.

| Lake            | Raw reads per sample | Reads after filtering per sample | Veg. <2 m | Identifiable Veg.<2 m | Tot. DNA | eDNA match Veg. | % Veg. <2 m detected in eDNA | % eDNA detected in Veg. | Additional identifiable extended surveys | Additional eDNA Veg match extended survey |
|-----------------|----------------------|----------------------------------|-----------|-----------------------|----------|-----------------|------------------------------|-------------------------|------------------------------------------|-------------------------------------------|
| A-tjern         | 706 954              | 280 277                          | 56        | 51                    | 30       | 25              | 49                           | 83                      | 14                                       | 1                                         |
| Brennskogtjønna | 919 672              | 584 537                          | 75        | 58                    | 23       | 17              | 29                           | 74                      | 15                                       | 2                                         |
| Einletvatnet    | 700 805              | 411 923                          | 59        | 50                    | 27       | 22              | 44                           | 82                      | 18                                       | 1                                         |
| Finnvatnet      | 516 878              | 31 288                           | 47        | 40                    | 16       | 10              | 25                           | 63                      | 13                                       | 3                                         |
| Gauptjern       | 673 977              | 279 752                          | 47        | 45                    | 22       | 17              | 38                           | 77                      | 18                                       | 3                                         |
| Jula Jávri      | 669 351              | 161 871                          | 36        | 31                    | 11       | 4               | 13                           | 36                      | 31                                       | 2                                         |
| Lakselvhøgda    | 613 386              | 4 880                            | 41        | 37                    | 10       | 9               | 24                           | 90                      | 14                                       | 1                                         |
| Lauvås          | 250 979              | 3 453                            | 44        | 41                    | 12       | 7               | 17                           | 58                      | 27                                       | 5                                         |
| Øvre Æråsvatnet | 744 618              | 340 976                          | 64        | 54                    | 24       | 20              | 37                           | 83                      | 40                                       | 2                                         |
| Paulan Jávri    | 747 665              | 178 532                          | 43        | 40                    | 17       | 10              | 25                           | 59                      | 34                                       | 2                                         |
| Rottjern        | 580 970              | 222 649                          | 47        | 42                    | 25       | 17              | 41                           | 68                      | 24                                       | 3                                         |
| Sum             | 7 125 255            | 2 500 138                        | 559       | 489                   | 217      | 158             |                              |                         | 248                                      | 25                                        |
| Mean            | 647750               | 227285                           | 50.8      | 44.5                  | 19.7     | 14.4            | 31.1                         | 70.3                    | 22.5                                     | 2.3                                       |
| Highest/lowest  | 3.7                  | 169.3                            | 2.1       | 1.9                   | 3        | 6.3             | 3.8                          | 2.5                     | 3.1                                      | 5                                         |

261 Taxa in the vegetation surveys (Veg.), number of taxa that could potentially be identified with the applied molecular marker used and available reference  
 262 database, and taxa actually identified in the eDNA. The results are given for vegetation surveys <2 m from lakeshore (including aquatics) and for additional  
 263 taxa recorded in extended surveys. Raw reads refer to all reads assigned to samples (S1 Table). The ratio between the highest and lowest value on each  
 264 category is given as a indicator of variation among lakes

265           Of 489 records <2 m from the lakeshore, the majority were rare (148) or scattered (146) in the  
266 vegetation; fewer were common (131) or dominant (64). An additional 245 observations of 46 taxa  
267 came from >2 m from the lakeshore (156 rare, 68 scattered, 19 common and 2 dominant).

268

## 269 **Molecular data**

270           The numbers of sequences matching entries in the regional arctic-boreal and EMBL-r117  
271 databases were 227 and 573 at 98% identity, respectively. For sequences matching both databases, we  
272 retained the arctic-boreal identification; this resulted in 11,236,288 reads of 301 sequences matched at  
273 100% similarity with at least 10 reads in total (S2 Table). There were 244 and 181 records of taxa that  
274 with certainty could be defined as true or false positive, respectively (see methods). We found no  
275 combination of filtering criteria that only filtered out the false positives without any loss of true  
276 positives (S3 Table). The best ratio was obtained when retaining sequences that were on average more  
277 common in samples than in negative controls, plus with at least two replicates in one sample and at  
278 least 10 reads per replicate. Applying these criteria filtered out 163 false positives leaving only 18  
279 records of three false positive taxa (Annonaceae, Meliaceae and Solanaceae), which were then  
280 removed as obvious contamination. However, it also removed 61 (25%) true positives, e.g., *Pinus*,  
281 which had high read numbers at lakes in pine forest and low ones at lakes where it is probably brought  
282 in as firewood, but which also occurred with high read numbers in two of the negative controls (S4  
283 Table). After matching against the local vegetation, 2,500,138 reads of 56 sequences remained.  
284 Sequences representing the same taxa were merged, resulting in 47 final taxa (Table 3). Taking into  
285 account some taxa shared sequences, e.g. *Carex* and *Salix*, these may potentially represent 81 taxa (S1  
286 Table).

287

288 **Table 3. Read numbers per taxa and per lake.**

289

| Family           | Taxa                                   | A-tj    | Bren    | Einl    | Finn  | Gaup    | Jula  | Laks  | Lauv  | Ovre    | Paul   | Rott   | Sum     |
|------------------|----------------------------------------|---------|---------|---------|-------|---------|-------|-------|-------|---------|--------|--------|---------|
| Asteraceae       | <i>Crepis paludosa</i>                 |         |         |         |       |         |       |       |       | 455     |        |        | 455     |
| Betulaceae       | <i>Alnus incana</i>                    | 48 183  | 117 855 |         |       | 40 802  |       |       |       |         | 131    | 15 710 | 222 681 |
| Betulaceae       | <i>Betula</i> spp.                     | 126 727 | 120 369 | 40 991  | 5 630 | 101 688 |       | 144   | 32    | 31 639  | 3 263  | 16 283 | 446 766 |
| Caryophyllaceae  | <i>Sagina</i> sp.                      |         | 46      | 10      | 37    |         | 18    |       |       | 10      | 24     |        | 145     |
| Cornaceae        | <i>Chamaepericlymenum suecicum</i>     |         |         | 338     |       |         |       |       |       |         |        |        | 338     |
| Cupressaceae     | <i>Juniperus communis</i>              | 261     | 752     |         |       |         |       |       | 45    |         | 27     |        | 1 085   |
| Cyperaceae       | <i>Carex lasiocarpa</i>                | 47      |         |         |       | 76      |       |       |       |         |        | 84     | 207     |
| Cyperaceae       | <i>Carex</i> spp.                      | 34      |         | 48      | 33    | 72      |       |       |       |         |        |        | 187     |
| Dryopteridaceae  | <i>Dryopteris</i> spp.                 | 10 088  | 16 947  | 6 406   | 6 781 | 5 882   | 87    | 1 886 | 1 141 | 6 252   | 216    | 5 239  | 60 925  |
| Ericaceae        | <i>Andromeda polifolia</i>             | 191     |         | 235     |       | 244     |       |       | 23    |         |        | 310    | 1 003   |
| Ericaceae        | <i>Calluna vulgaris</i>                |         |         | 1 384   | 357   |         |       |       |       |         |        |        | 1 741   |
| Ericaceae        | <i>Cassiope tetragona</i>              | 181     | 86      |         |       |         |       |       |       |         | 163    |        | 430     |
| Ericaceae        | <i>Chamaedaphne calyculata</i>         | 31      |         | 29      |       | 46      |       |       |       |         |        | 41     | 147     |
| Ericaceae        | <i>Empetrum nigrum</i>                 | 3 466   | 12 736  | 2 266   | 4 714 | 2 807   | 6 813 |       | 14    | 3 149   | 13 507 | 1 758  | 51 230  |
| Ericaceae        | <i>Oxycoccus microcarpus</i>           |         |         |         |       | 538     |       |       |       |         |        |        | 538     |
| Ericaceae        | <i>Phyllodoce caerulea</i>             | 1 386   | 305     |         |       |         | 165   |       |       |         |        |        | 1 856   |
| Ericaceae        | <i>Vaccinium vitis-idaea/myrtillus</i> | 2 005   | 2 042   | 916     | 308   | 1 286   |       |       |       | 189     | 815    | 394    | 7 955   |
| Ericaceae        | <i>Vaccinium uliginosum</i>            | 1 073   | 2 325   | 1 045   |       | 2 726   | 431   | 30    |       | 1 233   | 1 014  | 873    | 10 750  |
| Geraniaceae      | <i>Geranium sylvaticum</i>             |         |         |         |       |         |       |       |       | 68      | 145    |        | 213     |
| Haloragaceae     | <i>Myriophyllum alterniflorum</i>      | 11 389  |         | 273 929 |       |         |       |       |       | 226 753 |        |        | 512 071 |
| Isoetaceae       | <i>Isoetes</i> spp.                    |         |         | 27 136  |       |         |       |       |       | 14 411  |        |        | 41 547  |
| Lentibulariaceae | <i>Utricularia minor</i>               |         |         |         |       |         |       |       |       |         |        | 893    | 893     |
| Lycopodiaceae    | <i>Huperzia selago</i>                 | 783     | 710     |         |       |         |       |       | 10    |         | 27     | 195    | 1 725   |
| Lycopodiaceae    | Lycopodiaceae                          | 9 226   | 32 590  | 1 016   | 2 360 | 4 285   | 299   | 270   | 217   | 1 196   | 5 082  | 3 381  | 59 922  |
| Menyanthaceae    | <i>Menyanthes trifoliata</i>           | 26 842  | 467     | 17 384  | 1 173 | 18 978  |       | 98    | 871   | 378     |        | 42 408 | 108 599 |
| Numphaeaceae     | <i>Numphar pumila</i>                  |         |         |         |       |         |       |       |       |         |        | 63 844 | 63 844  |
| Plantaginaceae   | <i>Callitriche hermaphroditica</i>     |         |         | 951     |       |         | 5 598 |       |       |         |        |        | 6 549   |
| Plantaginaceae   | <i>Hippuris vulgare</i>                |         |         | 238     |       |         |       |       |       | 107     |        |        | 345     |



|                  |                                |         |         |         |        |         |         |       |       |         |         |         |        |           |
|------------------|--------------------------------|---------|---------|---------|--------|---------|---------|-------|-------|---------|---------|---------|--------|-----------|
| Poaceae          | <i>Festuca</i> spp.            | 30      |         |         | 2 724  |         |         |       |       |         |         |         |        | 2 754     |
| Polygonaceae     | <i>Oxyria digyna</i>           |         |         |         |        |         |         |       |       |         |         | 429     |        | 429       |
| Polypodiaceae    | <i>Athyrium</i> sp.            | 6 266   | 33 588  | 10 557  | 2 098  | 1 258   |         | 743   | 539   | 10 851  | 1 239   | 466     |        | 67 605    |
| Potamogetonaceae | <i>Potamogeton praelongus</i>  | 1 754   |         |         |        |         |         |       |       | 254     |         |         | 9 268  | 11 276    |
| Potamogetonaceae | <i>Potamogeton</i> sp.         | 28      |         | 19 281  |        |         |         |       |       | 12 817  |         | 1 335   |        | 33 461    |
| Potamogetonaceae | <i>Stuckenia filiformis</i>    | 4 964   | 183     |         |        | 7 023   |         |       |       |         |         |         | 246    | 12 416    |
| Ranunculaceae    | <i>Caltha palustris</i>        |         |         | 1 131   |        |         |         |       |       | 5 080   |         |         |        | 6 211     |
| Rosaceae         | <i>Comarum palustre</i>        | 258     |         |         |        | 1 058   |         |       |       | 222     |         |         |        | 1 538     |
| Rosaceae         | <i>Dryas octopetala</i>        |         | 750     |         |        |         | 37      |       |       |         |         |         | 394    | 1 181     |
| Rosaceae         | <i>Filipendula ulmaria</i>     | 850     |         | 957     |        | 2 293   |         |       |       | 2 520   |         | 6 019   |        | 12 639    |
| Rosaceae         | <i>Rubus chamaemorus</i>       | 1 453   |         | 75      |        | 197     |         |       |       |         |         | 317     |        | 2 042     |
| Rosaceae         | <i>Sorbus aucuparia</i>        | 1 198   | 894     | 1 915   |        | 1 953   |         |       |       | 1 468   |         |         |        | 7 428     |
| Salicaceae       | <i>Populus tremula</i>         | 2 009   | 1 671   |         | 1 225  |         | 27      |       |       | 1 152   |         |         | 48 201 | 54 285    |
| Salicaceae       | <i>Salicaceae</i>              | 4 488   | 182 354 | 1 212   | 246    | 68 186  | 148 060 | 141   |       | 15 658  | 149 450 | 2 542   |        | 572 337   |
| Saxifragaceae    | <i>Saxifraga aizoides</i>      |         | 585     | 30      |        |         |         |       |       |         |         |         |        | 615       |
| Saxifragaceae    | <i>Saxifraga oppositifolia</i> |         | 922     |         |        |         |         |       |       |         |         |         |        | 922       |
| Sparganiaceae    | <i>Sparganium</i> spp.         |         |         |         | 958    |         |         | 258   | 74    |         |         |         |        | 1 290     |
| Thelypteridaceae | <i>Phegopteris connectilis</i> | 4 776   | 13 594  | 1 104   | 1 357  | 100     |         | 546   | 132   | 2 085   | 1 014   | 366     |        | 25 074    |
| Woodsiaceae      | <i>Gymnocarpium dryopteris</i> | 10 290  | 42 766  | 1 339   | 1 287  | 18 254  | 336     | 764   | 355   | 3 029   | 1 986   | 2 082   |        | 82 488    |
| Sum DNA reads    |                                | 280 277 | 584 537 | 411 923 | 31 288 | 279 752 | 161 871 | 4 880 | 3 453 | 340 976 | 178 532 | 222 649 |        | 2 500 138 |

DNA and vegetation < 2m  
DNA and vegetation > 2m  
DNA only

Vegetation <2m and potentially >2m  
Vegetation only > 2m  
No DNA, no vegetation

290 The read numbers are sum of two DNA extractions with 6 PCR replicates for each. All read  
291 numbers are after the filtering steps in S2 Table. Note that the records of *Chamaeodaphne calyculata*  
292 are likely to represent false positives. For taxa only recorded in vegetation and/or filtered out of the  
293 eDNA records, see S1 Table. The lakes names are A-tjern (A-tj), Brennskogtjørna (Bren), Einletvatnet  
294 (Einl), Finnvatnet (Finn), Gaupstjern (Gaup), Jula Jávri (Jula), Lakselvhøgda (Laks), Lauvås (Lauv),  
295 Øvre Æråsvatnet (Ovre), Paulan Jávri (Paul), and Rottjern (Rott).

296

297

298 In our positive control, 7 out of 8 species were detected in all replicates. Only *Aira praecox*,  
299 which was added with the lowest DNA concentration, could not be detected. This indicates that the  
300 PCR and sequencing was successful for taxa with an extracted DNA concentration of  $\geq 0.03$  ng/ $\mu$ L (S5  
301 Table).

302

303 The gain in number of taxa when analysing two cores instead of one was  $2.5 \pm 1.2$  per lake. All  
304 data presented below are based on the upper 0-2 cm of sediment of two cores combined (but not from  
305 deeper levels as these were not sampled at all sites). This gave an average of  $19.7 \pm 6.9$  taxa (10-30) per  
306 lake (Table 2). Samples from below 2-cm depth provide an additional 14 records of 42 taxa, some not  
307 recorded in 0-2 cm samples (S1 Table).

308

## 309 **Detection of taxa in eDNA**

310 Of the 217 eDNA records, the majority matched taxa recorded within 2 m of the lake shore  
311 (Figure 2a). Higher proportions of dominant or common taxa were detected in DNA compared with  
312 scattered or rare ones (Fig 2b). Most dominant taxa, such as *Betula*, *Empetrum nigrum*, *Vaccinium*  
313 *uliginosum*, and *Salix*, were correctly detected at most or all lakes (Table 3), whereas some were  
314 filtered out (*Equisetum* spp., *Pinus sylvestris*, many *Poa*, S1 Table). Of dominants, only two *Juncus*  
315 and two *Eriophorum* species were not recorded. Many taxa that were rare or scattered were filtered out  
316 (S1 and S4 Table).

317

318 **Fig 2. Match between records of taxa in the sedimentary eDNA in relation to vegetation surveys.**

319 a) Number of records in the sedimentary eDNA in relation to vegetation survey distance. b)  
320 Percentage records in eDNA in relation to abundance in vegetation surveys. c) Variation in percentage  
321 data among families with >11 eDNA records. d) Variation in percentage of taxa detected among lakes.  
322 Percentages in b), c) and d) refers to percentage of taxa recorded in the vegetation that potentially  
323 could be identified with the DNA barcode used. Note that DNA of more taxa were likely recorded but  
324 filtered out (S1-S4 Tables) – these numbers are only shown in figure b).

325

326

327 Detection success and taxonomic resolution in the eDNA varied among families (Table 3, Fig  
328 2c). High success and resolution characterise Ericaceae and Rosaceae as they were identified to  
329 species level and successfully detected at most sites. Ferns (Dryopteridaceae, Thelypteridaceae,  
330 Woodsiaceae) and club mosses (Lycopodiaceae) were almost always detected, even when only  
331 growing >2 m from the lake shore. Aquatics (Haloragaceae, Lentibulariaceae, Menyanthaceae,  
332 Nymphaeaceae, Plantaginaceae, Potamogetonaceae, Sparganiaceae) were also well detected, often also  
333 when not recorded in the vegetation surveys. Deciduous trees and shrubs (Betulaceae, Salicaceae)  
334 were also correctly identified at most lakes although often at genus level. In contrast, Poaceae and  
335 Cyperaceae, which were common to dominant around most lakes, were underrepresented in the DNA  
336 records. Juncaceae and Asteraceae, which were present at all lakes, although mainly scattered or rare,  
337 were mainly filtered out due to presence in only one PCR repeat or only in samples from 2-8 cm depth  
338 (S1-S4 Tables).

339

340 The numbers of taxa recorded in vegetation, in eDNA, and as match between them varied two-  
341 to six-fold among lakes (Table 2, Fig 2d). Jula Jávri had the lowest match between eDNA and  
342 vegetation with only four taxa in common. Lakselvhøgda and Lauvås had extremely low read numbers  
343 after filtering. For Lauvås, Finnvatnet and Lakselvhøgda, 84%, 30% and 20%, respectively, of raw  
344 reads were allocated to algae. If we assume that a big unidentified sequence cluster also represents

345 algae, this increases to 69% for Lakselvhøgda, where a 15-20 cm algal layer was observed across most  
346 of the lake bottom. A lake-bottom algal layer was also observed at Jula Jávri, and in this we suspect  
347 that an unidentified cluster of 170,772 reads was algae. In most other lakes, algal reads were 3-15%  
348 (0.2% in Brennskogtjern, the lake with highest numbers of reads after filtering; algal data not shown).

349

350 Thirty-three records of 17 DNA taxa did not match vegetation taxa at a given lake (Table 3).  
351 These include taxa that are easily overlooked in vegetation surveys due to minute size (e.g., *Sagina*  
352 sp.), or only growing in deeper parts of the lake (e.g., *Potamogeton praelongus*). Other taxa are  
353 probably confined to ridge-tops of larger catchments, which lay outside the survey areas (e.g.,  
354 *Cassiope tetragona* and *Dryas octopetala*). Two tree species that occur as shrubs or dwarf shrubs at  
355 their altitudinal limits, *Alnus incana* and *Populus tremula*, were found in the DNA at high-elevation  
356 sites. Also, ferns were detected at several sites where they were not observed in the vegetation surveys.  
357 On balance, most mismatches probably relate to plants being overlooked in the vegetation surveys or  
358 growing outside the survey area, whereas *Chamaedaphne calyculata* likely represents a false positive  
359 (Table 3, S1 Appendix).

360

361 The multivariate ordinations gave similar results for the vegetation and eDNA records with the  
362 only lake from Pine forest, Brennskogtjønnna, and one of the two alpine lakes, Paulan Jávri, clearly  
363 distinguished on the first axis, whereas the lakes with varying cover of birch forest were in one cluster  
364 (Fig 3a-b). The other alpine lake, Jula Jávri, was only distinguished on the vegetation, probably due to  
365 the low number of taxa identified in the eDNA of this lake (Table 2). Percentages of variation  
366 explained by the first two axes were similar for the two analyses (CA Vegetation: Axis 1,  $\eta^2=0.50$ ,  
367 20.4%, Axis 2,  $\eta^2=0.37$ , 15.1%; eDNA: Axis 1,  $\eta^2=0.24$ , 18.9%, Axis 2,  $\eta^2=0.24$ , 18.5%). The  
368 Procrustes analyses indicated a good similarity between vegetation and eDNA (CA Correlation = 0.53,  
369  $P=0.099$ ; NSCA Correlation=0.59,  $P=0.045$ ).

370

371 **Fig 3. Multivariate ordination (Non Symmetric Correspondence Analysis; NSC) of the 11 lakes.**

372 The ordination is based on taxa recorded in the vegetation (a) and eDNA (b). Note that lakes in tall

373 forbs birch/pine mixed forest (A-tjern, Rottjern, Gaupjern are clustered together in both plots; so are  
374 also Einletvatnet and Øvre Æråsvatnet (both mire/birch forest at the island Andøya), whereas some  
375 lake with poorer DNA records show some differences in clustering.

376

## 377 **Probability of detecting taxa in vegetation and DNA records**

378 The posterior probability that all local taxa were recorded during the vegetation survey varied  
379 from 0.85-0.95 (S6 Table). Thus, on average, about three species may have been overlooked at each  
380 lake. The posterior probability that taxa recorded in the vegetation surveys and detected at least once  
381 by eDNA were also recorded in the DNA in a given lake (true positives) was 0.33-0.90, whereas the  
382 posterior probability of any DNA records representing a false positive varied from 0.06-0.33 per lake  
383 (S6 Table). There was evidence that the probability of detecting a species using eDNA ( $p_{DNA_I}$ ) was  
384 higher for deeper lakes (slope  $b_1 = 0.58$ , 95% CI = [0.20; 0.98], Fig 4). Not surprisingly a similar  
385 effect was found for lake size (slope  $b_1=0.25$  [0.10, 0.41]) as lake size and depth were highly  
386 correlated ( $r=0.81$ ). Catchment area ( $b_1=0.06$  [-0.15, 0.27]) and mean annual temperature ( $b_1=-0.03$  [-  
387 0.14, 0.08]) did not appear to influence probability of detection by eDNA.

388

389 **Fig 4. Lake depth versus detection probability.** Relationship between lake depth and probability  
390 that a species present in the vegetation and detected at least once by eDNA is detected by eDNA in a  
391 given lake. The relationship is modelled as a logit function and back-transformed to the probability  
392 scale.

393

## 394 **Discussion**

395 Taking into account the limitation of taxonomic resolution due to sequence sharing or taxa  
396 missing in the reference library, we were able to detect about one third of the taxa growing in the  
397 immediate vicinity of the lake using only two small sediment samples from the lake centre. The large

398 number of true positives lost (S1 Appendix) suggests that this proportion may be further improved.

399 Nevertheless, the current approach was sufficient to distinguish the main vegetation types.

400

## 401 **Taphonomy of environmental plant DNA**

402 The high proportion of taxa in the <2 m survey detected with eDNA than in the extended  
403 surveys indicates that eDNA is mainly locally deposited. The observation of taxa not recorded in the  
404 vegetation surveys but common in the region (Fig 3, S1 Table) indicates that some DNA does  
405 originate from some hundreds of meters or even a few km distant. Indeed, a higher correlation  
406 between catchment relief and total eDNA ( $R^2=0.42$ ) than eDNA matching records in the vegetation  
407 ( $R^2=0.34$ ), may suggest that runoff water from snow melt or material blown in also contributes. Thus,  
408 the taphonomy of eDNA may be similar to that of macrofossils [66, 67], except that eDNA may also  
409 be transported via non-biological particles (e.g. fine mineral grains). From other studies, pollen does  
410 not appear to contribute much to local eDNA records [15, 35, 37, 42, 47]. This is probably due to its  
411 generally low biomass compared with stems, roots and leaves, and to the resilience of the  
412 sporopollenin coat, which requires a separate lysis step in extraction of DNA [68].

413

414 The higher proportion of eDNA taxa that matched common or dominant taxa in the  
415 vegetation, compared with taxa that were rare or scattered, was as expected, as higher biomass should  
416 be related to a greater chance for deposition and preservation in the lake sediments [9]. Yoccoz *et al.*  
417 [6] found the same in their comparison of soil eDNA with standing vegetation. While some dominant  
418 taxa were filtered out in our study, their DNA was mainly present (S1 Appendix, S1-4 Tables), and  
419 most dominant taxa were recorded in all PCR replicates (not shown). Thus, for studies where the focus  
420 is on detecting dominant taxa, running costs may be reduced by performing fewer PCR replicates.

421

## 422 **Variation among lakes**

423           The variation among lakes seen in DNA-based detection of taxa shows that even when  
424 identical laboratory procedures are followed, the ability to detect taxa can vary. Our sample size of 11  
425 lakes does not allow a full evaluation of the reasons for this variation. Factors such as low pH or  
426 higher temperature may increase DNA degradation [16], but the two lakes with lowest numbers of  
427 reads after filtering in our study, Lakselvhøgda and Lauvås, had pH values close to optimal for DNA  
428 preservation (7.2 and 6.8, respectively, I.G. Alsos and A.G. Brown, pers. obs. 2016), and variation in  
429 temperature was low among our sites. The lack of an inflowing stream at Lakselvhøgda may reduce  
430 the supply of eDNA, but Lauvås has two inflows. For these two lakes, and to a lesser extent  
431 Finnvatnet, we suspect high algal abundance might have caused PCR competition [69]. PCR  
432 competition may also occurred in samples from Jula Jávri, but in this case we were not able to identify  
433 the most dominant cluster of sequences. These lakes are also small and shallow. Variation among  
434 eDNA qualities has also been observed in a study of 31 lakes on Taymyr Peninsula in Siberia [70]. We  
435 suspect that high algae production may be a limiting factor as we also have seen poor aDNA results in  
436 samples with high Loss on Ignition values, but this should be studied further. A potential solution to  
437 avoid solution to avoid PCR competition may be to design a primer to block amplification of algae as  
438 has been done for human DNA in studies of mammals eDNA [71].

439

## 440 **Variation among taxa**

441           The variation we observed among plant families, both in taxonomic resolution and likelihood  
442 of detection, is a general problem when using generic primers [45, 72, 73]. For example, the poor  
443 detection of the Cyperaceae may be due to the long sequence length of *Carex* and *Eriophorum* (>80  
444 bp), and most studies only detect it at genus or family level [38, 42, 74]. The low representation of  
445 Asteraceae may be due to its rare or scattered representation in the vegetation and/or its poor  
446 amplification. While some studies successfully amplify Asteraceae [15, 37, 38, 42, 75], others do not,  
447 even when other proxies indicate its presence in the environment [46]. This may be due to the high

448 percentage of Asteraceae taxa that have a one base-pair mismatch in the reverse primer [34]. Poaceae,  
449 which has no primer mismatch, is regularly detected in ancient DNA studies [15, 36-38, 41], and was  
450 present in nine lakes, although most records were filtered out due to occurrence in negative controls.  
451 To avoid any bias due to primer match and potentially increase the overall detection of taxa, one  
452 solution would be to use family-specific primers, such as ITS primers developed for Cyperaceae,  
453 Poaceae, and Asteraceae [36]. Alternatively, shotgun sequencing could be tested as this minimizes  
454 PCR biases [76, 77].

455

456         The common woody deciduous taxa *Betula* and *Salix*, as well as most common dwarf shrubs  
457 such as *Andromeda polifolia*, *Empetrum nigrum*, and *Vaccinium uliginosum*, were correctly detected  
458 in most cases. They are also regularly recorded in late-Quaternary lake-sediment samples [15, 25, 37,  
459 41, 70, 74]. These are ecologically important taxa in many northern ecosystems, and their reliable  
460 detection in eDNA could be expected to extend to other types of samples, e.g., samples relating to  
461 herbivore diet [44].

462

463         The general over-representation of spore plants in eDNA among taxa only found >2 m from  
464 the lake and those not recorded in the catchment vegetation raises the question as to whether eDNA  
465 can originate from spores. Spore-plant DNA is well represented in some studies [42, 78], is lacking in  
466 other studies [15, 37] and has been found as an exotic in one study [41]. As with pollen, the protective  
467 coat and low biomass of spores suggest that they are an unlikely source of the eDNA. This inference is  
468 supported by clear stratigraphic patterns shown by fern DNA in two lake records from Scotland.  
469 Records are ecologically consistent with other changes in vegetation, whereas spores at the same sites  
470 show no clear stratigraphy [42]. Preferential amplification could be an alternative explanation, but this  
471 is not likely as the amplification of fern DNA from herbarium specimens is poor [34]. It is possible  
472 that in some cases, including this study, we are detecting the minute but numerous gametophytes  
473 present in soil, which would not be visible in vegetation surveys.

474



475 Aquatic taxa were detected in all lakes, and they have been regularly identified in eDNA  
476 analyses of recent [42] and late-Quaternary lake sediments [15, 37, 38]. eDNA may be superior to  
477 vegetation surveys in some cases, e.g., *Potamogeton praelongus*, which is characteristic of deeper  
478 water (<https://www.brc.ac.uk/plantatlas/>) and was likely overlooked in surveys due to poor visibility.  
479 *Callitriche hermaphroditica* was observed in two lakes (Einleten and Jula javri), whereas *C. palustris*  
480 was observed at Einleten. We cross-checked the herbarium voucher and the DNA sequence and both  
481 seems correct, so potentially both were present but detected only in either eDNA or vegetation  
482 surveys. Overall, eDNA appears to detect aquatic plants more efficiently than terrestrial plants, which  
483 is not unexpected as the path from plant to sediment is short.

484

## 485 **The use of eDNA for reconstruction of present and past plant**

### 486 **richness**

487 In contrast to water samples, from which eDNA has been shown to represent up to 100 % of  
488 fish and amphibian taxa living in a lake [7, 79], one or two small, surficial sediment samples do not  
489 yield enough DNA to capture the full richness of vascular plants growing around a lake; the same  
490 limitation may apply in attempts to capture Holocene mammalian richness [22]. This is likely largely  
491 due to taphonomic limitations affecting preservation and transport on land, as aquatics were generally  
492 well detected. Also, surface samples are typically flocculent and represent a short time span, e.g. a few  
493 centimetre may represent 10-25 years ([49]; pers. obs.). Increasing the amount of material analysed,  
494 the amount of time sampled (by combining the top several cm of sediment), and/or the number of  
495 surface samples may improve detection rates for species that are rare, have low biomass and/or grow  
496 at some distance from the lake. In this study we identified more taxa when we used two surface  
497 samples and/or material from deeper in the sediment cores. Nevertheless, taphonomic constraints may  
498 mean that DNA of some species rarely reaches the lake sediment. On the technical side, both  
499 improvements in laboratory techniques and in bioinformatics could increase detection of rare species.  
500 In this study, DNA of many of the rarer taxa was recorded but was filtered out. As the rarest species

501 are also difficult to detect in vegetation surveys [59], combining conventional and DNA-based surveys  
502 may produce optimal estimates of biodiversity.

503

504 The potential taxonomic resolution (i.e., for eDNA taxa to be identified to species level) was  
505 similar or higher than that for macrofossils [80] or pollen [81, 82]. The potential taxonomic resolution  
506 of any of these methods depends on how well the local flora is represented in the available reference  
507 collection/library, site-specific characteristics, such as the complexity and type of the vegetation [34,  
508 82], and the morphological or genetic variation displayed by different taxonomic groups. In our case,  
509 only 3% of the taxa found in the vegetation surveys were missing in the reference database which  
510 likely improved the resolution. To reach 100% resolution, a different genetic marker is needed to  
511 avoid the problem of sequence sharing. Using longer barcodes may improve resolution [45, 83] and  
512 may work for modern samples, but for taxa with cpDNA sharing as e.g. *Salix*, nuclear regions should  
513 be explored. For ancient samples with highly degraded DNA, taxonomic resolution may potentially be  
514 increased by using a combining several markers, hybridization capture RAD probe techniques, or full-  
515 genome approach [77, 84-86].

516

517 The actual proportion of taxa in the vegetation detected in the eDNA records (average 28%  
518 and 18% for <2 m and extended surveys, respectively, not adjusting for taxonomic resolution) is  
519 similar to the results of various macrofossil [80, 87-89] and pollen studies [81, 82]. This contrasts with  
520 five previous studies of late-Quaternary sediments that compared aDNA with macrofossils and seven  
521 that did so with pollen; these showed rather poor richness in aDNA compared to other approaches  
522 (reviewed in [10]). We think a major explanation may be the quality and size of available reference  
523 collections/libraries, as the richness found in studies done prior to the publication of the boreal  
524 reference library (e.g. [15, 27, 35, 37]) was lower than in more recent studies, including this one [42,  
525 70, 90, 91]. The variation in laboratory procedures, the number and size of samples processed and the  
526 number of replicates also affect the results [4, 82, 86]. Nevertheless, the correlation between eDNA  
527 and vegetation found in the Procrustes analyses show that the current standard of the method is sufficient  
528 to detect major vegetation types.

529

## 530 **Conclusion**

531           Our study supports previous conclusions that eDNA mainly detects vegetation from within a  
532 lake catchment area. Local biomass is important, as dominant and common taxa showed the highest  
533 probability of detection. For aquatic vegetation, eDNA may be comparable with, or even superior to,  
534 in-lake vegetation surveys. Lake-based eDNA detection is currently not good enough to monitor  
535 modern terrestrial plant biodiversity because too many rare species are overlooked. The method can,  
536 however, detect a similar percentage of the local flora as is possible with macrofossil or pollen  
537 analyses. As many true positives are lost in the filtering process, and as even higher taxonomic  
538 resolution could be obtained by adding genetic markers or doing full genome analysis, there is the  
539 potential to increase detection rates. Similarly, results will improve as we learn more about how  
540 physical conditions influence detection success among lakes, and how sampling strategies can be  
541 optimized.

542

## 543 **Acknowledgements**

544           We thank Marie Kristine Føreid Merkel, Veronica Rystad, Premasany Kanapathippillai, Chris  
545 Ware, Sarah Lovibond, Martin Årseth-Hansen, Torbjørn Alm and Antony G. Brown for field  
546 assistance, Department for Medical Biology at UiT for use of laboratory for extraction, Frederic Boyer  
547 for raw data handling, Torbjørn Alm for help with identifying plant specimens, and H. John B. Birks  
548 for valuable comments on an earlier draft of this manuscript.

549

## 550 **Conflict of Interest**

551           The authors would like to mention that LG is one of the co-inventors of patents related to g-h  
552 primers and the subsequent use of the P6 loop of the chloroplast *trnL* (UAA) intron for plant  
553 identification using degraded template DNA. These patents only restrict commercial applications and  
554 have no impact on the use of this locus by academic researchers.

555

556

## 557 **References**

558

- 559 1. Orlando L, Cooper A. Using ancient DNA to understand evolutionary and ecological  
560 processes. *Annu Rev Ecol Evol Syst*. 2014;45(1):573-98. doi: 10.1146/annurev-ecolsys-  
561 120213-091712.
- 562 2. Brown TA, Barnes IM. The current and future applications of ancient DNA in Quaternary  
563 science. *J Quat Sci*. 2015;30(2):144-53. doi: 10.1002/jqs.2770.
- 564 3. Pedersen MW, Overballe-Petersen S, Ermini L, Sarkissian CD, Haile J, Hellstrom M, et  
565 al. Ancient and modern environmental DNA. *Philos Trans R Soc London Ser B*.  
566 2015;370(1660):20130383. Epub 2014/12/10. doi: 10.1098/rstb.2013.0383. PubMed  
567 PMID: 25487334; PubMed Central PMCID: PMC4275890.
- 568 4. Thomsen PF, Willerslev E. Environmental DNA - An emerging tool in conservation for  
569 monitoring past and present biodiversity. *Biol Conserv*. 2015;183:4-18. doi:  
570 10.1016/j.biocon.2014.11.019.

- 571 5. Taberlet P, Coissac E, Pompanon F, Brochmann C, Willerslev E. Towards next-  
572 generation biodiversity assessment using DNA metabarcoding. *Mol Ecol.*  
573 2012;21(8):2045-50. doi: 10.1111/j.1365-294X.2012.05470.x.
- 574 6. Yoccoz NG, Bråthen KA, Gielly L, Haile J, Edwards ME, Goslar T, et al. DNA from soil  
575 mirrors plant taxonomic and growth form diversity. *Mol Ecol.* 2012;21(15):3647-55. doi:  
576 10.1111/j.1365-294X.2012.05545.x.
- 577 7. Valentini A, Taberlet P, Miaud C, Civade R, Herder J, Thomsen PF, et al. Next-  
578 generation monitoring of aquatic biodiversity using environmental DNA metabarcoding.  
579 *Mol Ecol.* 2016;25(4):929-42. doi: 10.1111/mec.13428.
- 580 8. Wilcox TM, McKelvey KS, Young MK, Sepulveda AJ, Shepard BB, Jane SF, et al.  
581 Understanding environmental DNA detection probabilities: A case study using a stream-  
582 dwelling char *Salvelinus fontinalis*. *Biol Conserv.* 2016;194:209-16. doi:  
583 <http://dx.doi.org/10.1016/j.biocon.2015.12.023>.
- 584 9. Barnes MA, Turner CR. The ecology of environmental DNA and implications for  
585 conservation genetics. *Conserv Genet.* 2016;17(1):1-17. doi: 10.1007/s10592-015-0775-  
586 4.
- 587 10. Birks HJB, Birks HH. How have studies of ancient DNA from sediments contributed to  
588 the reconstruction of Quaternary floras? *New Phytol.* 2016;209:499-506. doi:  
589 10.1111/nph.13657.
- 590 11. Torti A, Lever MA, Jørgensen BB. Origin, dynamics, and implications of extracellular  
591 DNA pools in marine sediments. *Marine Genomics.* 2015;24, Part 3:185-96. doi:  
592 <http://dx.doi.org/10.1016/j.margen.2015.08.007>.
- 593 12. Deiner K, Altermatt F. Transport distance of invertebrate environmental DNA in a  
594 natural river. *PLoS ONE.* 2014;9(2):e88786. doi: 10.1371/journal.pone.0088786.

- 595 13. Barnes MA, Turner CR, Jerde CL, Renshaw MA, Chadderton WL, Lodge DM.  
596 Environmental conditions influence eDNA persistence in aquatic systems. *Environmental*  
597 *Science & Technology*. 2014;48(3):1819-27. doi: 10.1021/es404734p.
- 598 14. Andersen K, Bird KL, Rasmussen M, Haile J, Breuning-Madsen H, Kjær KH, et al.  
599 Meta-barcoding of ‘dirt’ DNA from soil reflects vertebrate biodiversity. *Mol Ecol*.  
600 2012;21:1966-79. doi: 10.1111/j.1365-294X.2011.05261.x.
- 601 15. Parducci L, Matetovici I, Fontana SL, Bennett KD, Suyama Y, Haile J, et al. Molecular-  
602 and pollen-based vegetation analysis in lake sediments from central Scandinavia. *Mol*  
603 *Ecol*. 2013;22:3511-24. doi: 10.1111/mec.12298.
- 604 16. Strickler KM, Fremier AK, Goldberg CS. Quantifying effects of UV-B, temperature, and  
605 pH on eDNA degradation in aquatic microcosms. *Biol Conserv*. 2015;183(0):85-92. doi:  
606 <http://dx.doi.org/10.1016/j.biocon.2014.11.038>.
- 607 17. Ficetola GF, Pansu J, Bonin A, Coissac E, Giguet-Covex C, De Barba M, et al.  
608 Replication levels, false presences and the estimation of the presence/absence from  
609 eDNA metabarcoding data. *Mol Ecol Res*. 2015;15(3):543-56. doi: 10.1111/1755-  
610 0998.12338.
- 611 18. Deiner K, Walser J-C, Mächler E, Altermatt F. Choice of capture and extraction methods  
612 affect detection of freshwater biodiversity from environmental DNA. *Biol Conserv*.  
613 2015;183:53-63. doi: <http://dx.doi.org/10.1016/j.biocon.2014.11.018>.
- 614 19. Lahoz-Monfort JJ, Guillera-Arroita G, Tingley R. Statistical approaches to account for  
615 false-positive errors in environmental DNA samples. *Mol Ecol Res*. 2016;16:673-85. doi:  
616 10.1111/1755-0998.12486.
- 617 20. Nguyen NH, Smith D, Peay K, Kennedy P. Parsing ecological signal from noise in next  
618 generation amplicon sequencing. *New Phytol*. 2015;205(4):1389-93. doi:  
619 10.1111/nph.12923.

- 620 21. Evans NT, Olds BP, Renshaw MA, Turner CR, Li Y, Jerde CL, et al. Quantification of  
621 mesocosm fish and amphibian species diversity via environmental DNA metabarcoding.  
622 Mol Ecol Res. 2016;16(1):29-41. doi: 10.1111/1755-0998.12433.
- 623 22. Giguet-Covex C, Pansu J, Arnaud F, Rey P-J, Griggo C, Gielly L, et al. Long livestock  
624 farming history and human landscape shaping revealed by lake sediment DNA. Nat  
625 Commun. 2014;5. doi: 10.1038/ncomms4211.
- 626 23. Rawlence NJ, Lowe DJ, Wood JR, Young JM, Churchman GJ, Huang Y-T, et al. Using  
627 palaeoenvironmental DNA to reconstruct past environments: progress and prospects. J  
628 Quat Sci. 2014;29(7):610-26. doi: 10.1002/jqs.2740.
- 629 24. Smol JP, Birks HJ, Last WM, editors. Terrestrial, algal, and siliceous indicators.  
630 Heidelberg: Springer; 2001.
- 631 25. Pedersen MW, Ruter A, Schweger C, Friebe H, Staff RA, Kjeldsen KK, et al. Postglacial  
632 viability and colonization in North America's ice-free corridor. Nature. 2016;537:45-9.  
633 doi: 10.1038/nature19085  
634 [http://www.nature.com/nature/journal/vaop/ncurrent/abs/nature19085.html#supplementary-](http://www.nature.com/nature/journal/vaop/ncurrent/abs/nature19085.html#supplementary-information)  
635 [information.](http://www.nature.com/nature/journal/vaop/ncurrent/abs/nature19085.html#supplementary-information)
- 636 26. Birks HH, Giesecke T, Hewitt GM, Tzedakis PC, Bakke J, Birks HJB. Comment on  
637 "Glacial survival of boreal trees in northern Scandinavia". Science. 2012;338(6108):742.  
638 doi: 10.1126/science.1225345.
- 639 27. Parducci L, Jørgensen T, Tollefsrud MM, Elverland E, Alm T, Fontana SL, et al. Glacial  
640 survival of boreal trees in northern Scandinavia. Science. 2012;335(6072):1083-6. doi:  
641 10.1126/science.1216043.
- 642 28. Parducci L, Edwards ME, Bennett KD, Alm T, Elverland E, Tollefsrud MM, et al.  
643 Response to Comment on "Glacial Survival of Boreal Trees in Northern Scandinavia".  
644 Science. 2012;338(6108):742. doi: 10.1126/science.1225476.

- 645 29. Smith O, Momber G, Bates R, Garwood P, Fitch S, Pallen M, et al. Sedimentary DNA  
646 from a submerged site reveals wheat in the British Isles 8000 years ago. *Science*.  
647 2015;347(6225):998-1001. doi: 10.1126/science.1261278.
- 648 30. Weiß CL, Dannemann M, Prüfer K, Burbano HA. Contesting the presence of wheat in  
649 the British Isles 8,000 years ago by assessing ancient DNA authenticity from low-  
650 coverage data. *eLife*. 2015;4. doi: 10.7554/eLife.10005.
- 651 31. Birks HH, Bjune AE. Can we detect a west Norwegian tree line from modern samples of  
652 plant remains and pollen? Results from the DOORMAT project. *Veg Hist Archaeobot*.  
653 2010;19(4):325-40. doi: 10.1007/s00334-010-0256-0. PubMed PMID:  
654 WOS:000280825200007.
- 655 32. Jackson ST. Representation of flora and vegetation in Quaternary fossil assemblages:  
656 known and unknown knowns and unknowns. *Quat Sci Rev*. 2012;49:1-15. doi:  
657 <http://dx.doi.org/10.1016/j.quascirev.2012.05.020>.
- 658 33. Taberlet P, Coissac E, Pompanon F, Gielly L, Miquel C, Valentini A, et al. Power and  
659 limitations of the chloroplast trnL (UAA) intron for plant DNA barcoding. *Nucleic Acids*  
660 *Res*. 2007;35(3):e14. doi: 10.1093/nar/gkl1938. PubMed PMID: ISI:000244429800001.
- 661 34. Sønstebo JH, Gielly L, Brysting AK, Elven R, Edwards M, Haile J, et al. Using next-  
662 generation sequencing for molecular reconstruction of past Arctic vegetation and climate.  
663 *Mol Ecol Res*. 2010;10(6):1009-18. doi: 10.1111/j.1755-0998.2010.02855.x.
- 664 35. Jørgensen T, Haile J, Möller P, Andreev A, Boessenkool S, Rasmussen M, et al. A  
665 comparative study of ancient sedimentary DNA, pollen and microfossils from permafrost  
666 sediments of northern Siberia reveals long-term vegetational stability. *Mol Ecol*.  
667 2012;21(8):1989-2003. doi: 10.1111/j.1365-294X.2011.05287.x.



- 668 36. Willerslev E, Davison J, Moora M, Zobel M, Coissac E, Edwards ME, et al. Fifty  
669 thousand years of Arctic vegetation and megafaunal diet. *Nature*. 2014;506(7486):47-51.  
670 doi: 10.1038/nature12921  
671 [http://www.nature.com/nature/journal/v506/n7486/abs/nature12921.html#supplementary-  
672 information](http://www.nature.com/nature/journal/v506/n7486/abs/nature12921.html#supplementary-<br/>672 information).  
673 37. Pedersen MW, Ginolhac A, Orlando L, Olsen J, Andersen K, Holm J, et al. A  
674 comparative study of ancient environmental DNA to pollen and macrofossils from lake  
675 sediments reveals taxonomic overlap and additional plant taxa. *Quat Sci Rev*.  
676 2013;75(0):161-8. doi: <http://dx.doi.org/10.1016/j.quascirev.2013.06.006>.  
677 38. Boessenkool S, McGlynn G, Epp LS, Taylor D, Pimentel M, Gizaw A, et al. Use of  
678 ancient sedimentary DNA as a novel conservation tool for high-altitude tropical  
679 biodiversity. *Conserv Biol*. 2014;28(2):446-55. doi: 10.1111/cobi.12195.  
680 39. Pansu J, Giguet-Covex C, Ficotola GF, Gielly L, Boyer F, Zinger L, et al. Reconstructing  
681 long-term human impacts on plant communities: an ecological approach based on lake  
682 sediment DNA. *Mol Ecol*. 2015;24:1485-98. doi: 10.1111/mec.13136.  
683 40. Paus A, Boessenkool S, Brochmann C, Epp LS, Fabel D, Haflidason H, et al. Lake Store  
684 Finnsjøen – a key for understanding Lateglacial/early Holocene vegetation and ice sheet  
685 dynamics in the central Scandes Mountains. *Quat Sci Rev*. 2015;121:36-51. doi:  
686 <http://dx.doi.org/10.1016/j.quascirev.2015.05.004>.  
687 41. Alsos IG, Sjögren P, Edwards ME, Landvik JY, Gielly L, Forwick M, et al. Sedimentary  
688 ancient DNA from Lake Skartjørna, Svalbard: Assessing the resilience of arctic flora to  
689 Holocene climate change. *The Holocene*. 2016;26(4):627-42. doi:  
690 10.1177/0959683615612563.

- 691 42. Sjögren P, Edwards ME, Gielly L, Langdon CT, Croudace IW, Merkel MKF, et al. Lake  
692 sedimentary DNA accurately records 20th Century introductions of exotic conifers in  
693 Scotland. *New Phytol.* 2017;213(2):929-41. doi: 10.1111/nph.14199.
- 694 43. De Barba M, Miquel C, Boyer F, Mercier C, Rioux D, Coissac E, et al. DNA  
695 metabarcoding multiplexing and validation of data accuracy for diet assessment:  
696 application to omnivorous diet. *Mol Ecol Res.* 2014;14(2):306-23. doi: 10.1111/1755-  
697 0998.12188.
- 698 44. Soininen EM, Gauthier G, Bilodeau F, Berteaux D, Gielly L, Taberlet P, et al. Highly  
699 overlapping diet in two sympatric lemming species during winter revealed by DNA  
700 metabarcoding. *Plos One.* 2015;10:e0115335.
- 701 45. Fahner NA, Shokralla S, Baird DJ, Hajibabaei M. Large-scale monitoring of plants  
702 through environmental DNA metabarcoding of soil: Recovery, resolution, and annotation  
703 of four DNA markers. *PLoS ONE.* 2016;11(6):e0157505. doi:  
704 10.1371/journal.pone.0157505.
- 705 46. Soininen EM, Valentini A, Coissac E, Miquel C, Gielly L, Brochmann C, et al. Analysing  
706 diet of small herbivores: the efficiency of DNA barcoding coupled with high-throughput  
707 pyrosequencing for deciphering the composition of complex plant mixtures. *Frontiers in*  
708 *Zoology.* 2009;6:16. doi: doi:10.1186/1742-9994-6-16.
- 709 47. Parducci L, Väiliranta M, Salonen JS, Ronkainen T, Matetovici I, Fontana SL, et al. Proxy  
710 comparison in ancient peat sediments: pollen, macrofossil and plant DNA. *Philos Trans R*  
711 *Soc London Ser B.* 2015;370(1660):20130382. doi: 10.1098/rstb.2013.0382.
- 712 48. Alm T. Øvre Æråsvatn – palynostratigraphy of a 22,000 to 10,000 B.P. lacustrine record  
713 on Andøya, Northern Norway. *Boreas.* 1993;22:171-88.
- 714 49. Jensen C, Kunzendorf H, Vorren K-D. Pollen deposition rates in peat and lake sediments  
715 from the *Pinus sylvestris* L. forest-line ecotone of northern Norway. Review of

- 716 Palaeobotany and Palynology. 2002;121(2):113-32. doi: 10.1016/s0034-6667(02)00077-  
717 5.
- 718 50. Jensen C, Kuiper JGJ, Vorren K-D. First post-glacial establishment of forest trees: early  
719 Holocene vegetation, mollusc settlement and climate dynamics in central Troms, North  
720 Norway. *Boreas*. 2002;31(3):285-301. doi: 10.1111/j.1502-3885.2002.tb01074.x.
- 721 51. Jensen C, Vorren K-D. Holocene vegetation and climate dynamics of the boreal alpine  
722 ecotone of northwestern Fennoscandia. *J Quat Sci*. 2008;23(8):719-43. doi:  
723 10.1002/jqs.1155.
- 724 52. Vorren TO, Vorren K-D, Aasheim O, Dahlgren KIT, Forwick M, Hassel K.  
725 Palaeoenvironment in northern Norway between 22.2 and 14.5 cal. ka BP. *Boreas*. 2013:  
726 876–95 doi: 10.1111/bor.12013.
- 727 53. Elven R. J. Lid & D.T. Lid. *Norsk flora*. 7th edition. Oslo: Det Norske Samlaget; 2005.
- 728 54. Elven R, Murray DF, Razzhivin VY, Yurtsev BA. Annotated checklist of the Panarctic  
729 Flora (PAF). Vascular plants. Natural History Museum, University of Oslo:  
730 CAFF/University of Oslo; 2011 [cited 2013]. Available from: <http://nhm2.uio.no/paf/>.
- 731 55. Binladen J, Gilbert MTP, Bollback JP, Panitz F, Bendixen C, Nielsen R, et al. The use of  
732 coded PCR primers enables high-throughput sequencing of multiple homolog  
733 amplification products by 454 parallel sequencing. *PLoS ONE*. 2007;2(2):e197. doi:  
734 10.1371/journal.pone.0000197.
- 735 56. Valentini A, Miquel C, Nawaz M, Bellemain E, Coissac E, Pompanon F, et al. New  
736 perspectives in diet analysis based on DNA barcoding and parallel pyrosequencing: the  
737 trnL approach. *Mol Ecol Res*. 2009;24(2):110 - 7.
- 738 57. Boyer F, Mercier C, Bonin A, Le Bras Y, Taberlet P, Coissac E. OBITOOLS: a unix-  
739 inspired software package for DNA metabarcoding. *Mol Ecol Res*. 2016;16(1):176-82.  
740 doi: 10.1111/1755-0998.12428.

- 741 58. Yoccoz NG. The future of environmental DNA in ecology. *Mol Ecol.* 2012;21(8):2031-8.  
742 doi: 10.1111/j.1365-294X.2012.05505.x.
- 743 59. Guisan A, Broennimann O, Engler R, Vust M, Yoccoz NG, Lehmann A, et al. Using  
744 niche-based models to improve the sampling of rare species. *Conserv Biol.*  
745 2006;20(2):501-11. doi: 10.1111/j.1523-1739.2006.00354.x.
- 746 60. Pélissier R, Couteron P, Dray S, Sabatier D. Consistency between ordination techniques  
747 and diversity measurements: Two strategies for species occurrence data. *Ecology.*  
748 2003;84(1):242-51. doi: 10.1890/0012-9658(2003)084[0242:CBOTAD]2.0.CO;2.
- 749 61. Greenacre M. Correspondence analysis of raw data. *Ecology.* 2010;91(4):958-63. doi:  
750 10.1890/09-0239.1.
- 751 62. Peres-Neto PR, Jackson DA. How well do multivariate data sets match? The advantages  
752 of a Procrustean superimposition approach over the Mantel test. *Oecologia.*  
753 2001;129(2):169-78. doi: 10.1007/s004420100720.
- 754 63. Oksanen J, Blanchet FG, Friendly M, Kindt R, Legendre P, McGlenn D, et al. *vegan*:  
755 Community Ecology Package. R package version 2.4-3. 2017.
- 756 64. Chambert T, Miller DAW, Nichols JD. Modeling false positive detections in species  
757 occurrence data under different study designs. *Ecology.* 2015;96(2):332-9. doi:  
758 10.1890/14-1507.1.
- 759 65. Brooks SP, Gelman A. Alternative methods for monitoring convergence of iterative  
760 simulations. *Journal of Computational and Graphical Statistics.* 1998;7:434-55.
- 761 66. Jackson ST, Booth RK. Validation of pollen studies. In: Elias SA, editor. *Encyclopedia of*  
762 *Quaternary science.* London: Elsevier; 2007. p. 2413-22.
- 763 67. Dieffenbacher-Krall AC. Plant macrofossil methods and studies: Surface samples,  
764 taphonomy, representation. In: Elias SA, editor. *Encyclopedia of Quaternary Science.*  
765 Oxford: Elsevier; 2013. p. 684-9.

- 766 68. Kraaijeveld K, de Weger LA, Ventayol García M, Buermans H, Frank J, Hiemstra PS, et  
767 al. Efficient and sensitive identification and quantification of airborne pollen using next-  
768 generation DNA sequencing. *Mol Ecol Res.* 2015;15(1):8-16. doi: 10.1111/1755-  
769 0998.12288.
- 770 69. Piñol J, Mir G, Gomez-Polo P, Agustí N. Universal and blocking primer mismatches  
771 limit the use of high-throughput DNA sequencing for the quantitative metabarcoding of  
772 arthropods. *Mol Ecol Res.* 2015;15(4):819-30. doi: 10.1111/1755-0998.12355.
- 773 70. Niemeyer B, Epp LS, Stoof-Leichsenring KR, Pestryakova LA, Herzsuh U. A  
774 comparison of sedimentary DNA and pollen from lake sediments in recording vegetation  
775 composition at the Siberian treeline. *Mol Ecol Res.* 2017. doi: 10.1111/1755-0998.12689.
- 776 71. Boessenkool S, Epp LS, Haile J, Bellemain EVA, Edwards M, Coissac E, et al. Blocking  
777 human contaminant DNA during PCR allows amplification of rare mammal species from  
778 sedimentary ancient DNA. *Mol Ecol.* 2011;no-no. doi: 10.1111/j.1365-  
779 294X.2011.05306.x.
- 780 72. CBOL PWG, Hollingsworth PM, Forrest LL, Spouge JL, Hajibabaei M, Ratnasingham S,  
781 et al. A DNA barcode for land plants. *Proceedings of the National Academy of Sciences.*  
782 2009;106(31):12794-7. doi: 10.1073/pnas.0905845106.
- 783 73. Hollingsworth PM, Graham SW, Little DP. Choosing and using a plant DNA barcode.  
784 *PLoS ONE.* 2011;6(5):e19254. doi: 10.1371/journal.pone.0019254.
- 785 74. Epp LS, Gussarova G, Boessenkool S, Olsen J, Haile J, Schrøder-Nielsen A, et al. Lake  
786 sediment multi-taxon DNA from North Greenland records early post-glacial appearance  
787 of vascular plants and accurately tracks environmental changes. *Quat Sci Rev.*  
788 2015;117(0):152-63. doi: <http://dx.doi.org/10.1016/j.quascirev.2015.03.027>.

- 789 75. Hiiesalu I, ÖPik M, Metsis M, Lilje L, Davison J, Vasar M, et al. Plant species richness  
790 belowground: higher richness and new patterns revealed by next-generation sequencing.  
791 Mol Ecol. 2011;21:2004-16. doi: 10.1111/j.1365-294X.2011.05390.x.
- 792 76. Malé P-JG, Bardon L, Besnard G, Coissac E, Delsuc F, Engel J, et al. Genome skimming  
793 by shotgun sequencing helps resolve the phylogeny of a pantropical tree family. Mol Ecol  
794 Res. 2014;14(5):966-75. doi: 10.1111/1755-0998.12246.
- 795 77. Coissac E, Hollingsworth PM, Lavergne S, Taberlet P. From barcodes to genomes:  
796 extending the concept of DNA barcoding. Mol Ecol. 2016:1423-8. doi:  
797 10.1111/mec.13549.
- 798 78. Wilmshurst JM, Moar NT, Wood JR, Bellingham PJ, Findlater AM, Robinson JJ, et al.  
799 Use of pollen and ancient DNA as conservation baselines for offshore islands in New  
800 Zealand. Conserv Biol. 2014;28(1):202-12. doi: 10.1111/cobi.12150.
- 801 79. Lopes CM, Sasso T, Valentini A, Dejean T, Martins M, Zamudio KR, et al. eDNA  
802 metabarcoding: a promising method for anuran surveys in highly diverse tropical forests.  
803 Mol Ecol Res. 2016:n/a-n/a. doi: 10.1111/1755-0998.12643.
- 804 80. Allen JRM, Huntley B. Estimating past floristic diversity in montane regions from  
805 macrofossil assemblages. J Biogeogr. 1999;26(1):55-73. doi: 10.1046/j.1365-  
806 2699.1999.00284.x.
- 807 81. Meltsov V, Poska A, Odgaard BV, Sammul M, Kull T. Palynological richness and pollen  
808 sample evenness in relation to local floristic diversity in southern Estonia. Review of  
809 Palaeobotany and Palynology. 2011;166(3-4):344-51. doi:  
810 <http://dx.doi.org/10.1016/j.revpalbo.2011.06.008>.
- 811 82. Birks HJB, Felde VA, Bjune AE, Grytnes J-A, Seppä H, Giesecke T. Does pollen-  
812 assemblage richness reflect floristic richness? A review of recent developments and

- 813 future challenges. *Review of Palaeobotany and Palynology*. 2016;228:1-25. doi:  
814 <http://dx.doi.org/10.1016/j.revpalbo.2015.12.011>.
- 815 83. Lamb EG, Winsley T, Piper CL, Freidrich SA, Siciliano SD. A high-throughput  
816 belowground plant diversity assay using next-generation sequencing of the trnL intron.  
817 *Plant and Soil*. 2016;404(1):361-72. doi: 10.1007/s11104-016-2852-y.
- 818 84. Schmid S, Genevest R, Gobet E, Suchan T, Sperisen C, Tinner W, et al. HyRAD-X, a  
819 versatile method combining exome capture and RAD sequencing to extract genomic  
820 information from ancient DNA. *Methods in Ecology and Evolution*. 2017;8(10):1374-88.  
821 doi: 10.1111/2041-210X.12785.
- 822 85. Suchan T, Pitteloud C, Gerasimova NS, Kostikova A, Schmid S, Arrigo N, et al.  
823 Hybridization capture using RAD probes (hyRAD), a new tool for performing genomic  
824 analyses on collection specimens. *PLoS ONE*. 2016;11(3):e0151651. doi:  
825 10.1371/journal.pone.0151651.
- 826 86. Parducci L, Bennett KD, Ficetola GF, Alsos IG, Suyama Y, Wood JR, et al. Transley  
827 Reviews: Ancient plant DNA from lake sediments. *New Phytol*. 2017;214(3):924-42. doi:  
828 10.1111/nph.14470.
- 829 87. Dunwiddie PW. Macrofossil and pollen representation of coniferous trees in modern  
830 sediments from Washington. *Ecology*. 1987;68(1):1-11. doi: 10.2307/1938800.
- 831 88. McQueen DR. Macroscopic plant remains in recent lake sediments. *Tuatara*.  
832 1969;17(1):13-9.
- 833 89. Drake H, Burrows CJ. The influx of potential macrofossils into Lady Lake, north  
834 Westland, New Zealand. *New Zealand Journal of Botany*. 1980;18(2):257-74. doi:  
835 10.1080/0028825X.1980.10426924.
- 836 90. Zimmermann H, Raschke E, Epp L, Stooß-Leichsenring K, Schirrmeister L, Schwamborn  
837 G, et al. The history of tree and shrub taxa on Bol'shoy Lyakhovsky Island (New Siberian

838 Archipelago) since the Last Interglacial uncovered by sedimentary ancient DNA and  
839 pollen data. *Genes*. 2017;8(10):273. PubMed PMID: doi:10.3390/genes8100273.  
840 91. Zimmermann HH, Raschke E, Epp LS, Stoof-Leichsenring KR, Schwamborn G,  
841 Schirrmeister L, et al. Sedimentary ancient DNA and pollen reveal the composition of  
842 plant organic matter in Late Quaternary permafrost sediments of the Buor Khaya  
843 Peninsula (north-eastern Siberia). *Biogeosciences*. 2017;14(3):575-96. doi: 10.5194/bg-  
844 14-575-2017.

## 845 **Supporting Information**

### 846 **S1 Appendix. Comments on true and false positives.**

847

848 **S1 Table. All taxa recorded in the vegetation surveys (<2 m and/or larger surveys) at 11 lakes in**  
849 **northern Norway. Number refers to the highest abundance recorded among 2-17 vegetation polygons**  
850 **in the larger vegetation surveys (1=rare, 2=scattered, 3=frequent, and 4=dominant). Thus, 2316**  
851 **records were combined to give one vegetation record per species and lake, in total 1000 records. Taxa**  
852 **match represent taxa that could potentially be identified by the molecular method used: ND=no data in**  
853 **reference library, ID incomp=could not be identified in DNA because the vegetation is incomplete**  
854 **identified, <12 bp= filtered out in initial filtering steps due to short sequence length. Max=the**  
855 **maximum abundance score observed at any of the lakes. The lakes names are A-tjern (A-tj),**  
856 **Brennskogtjørna (Bren), Einletvatnet (Einl), Finnvatnet (Finn), Gaupjern (Gaup), Jula Jávri (Jula),**  
857 **Lakselvhøgda (Laks), Lauvås (Lauv), Øvre Æråsvatnet (Ovre), Paulan Jávri (Paul), and Rottjern**  
858 **(Rott). See colour codes below. Hatched colour refer to DNA-vegetation match at higher taxonomic**  
859 **level (e.g. *Salix*).**

860

861 **S2 Table. Number of sequence reads remaining after each filtering step for 42 samples from**  
862 **modern lake sediment collected in northern Norway, 6 extraction negative controls, 6 PCR negative**



863 controls and 2 PCR positive controls. Six individually tagged PCR repeats were run for each sample,  
864 giving a total of 336 PCR samples. Numbers of sequences and unique sequences are given for  
865 applying the criteria to all sequences.

866

867 **S3 Table. Effect of different filtering criteria on the number of True Positives.** True positive (TP,  
868 defined as species also detected in vegetation surveys thus lower than the numbers given in Table 2)  
869 and False Positives (FP, defined as species not found in the regional flora; including 15 potential food  
870 plants) per lake and in total. The criteria used in this study, which gives the highest ratio between TP  
871 kept and FP lost, is shown in bold. 1) Minimum number of reads in lake samples, 2) minimum number  
872 of PCR repeats in lake samples, 3) “1” if occurring in more than 1 PCR repeat of negative control  
873 samples, 4) “1” if number of PCR repeats in lake sample > PCR repeats in negative control samples,  
874 5) “1” if mean number of reads in lake samples > mean number of reads in negative control samples.  
875 The lakes names are A-tjern (A-tj), Brennskogtjørna (Bren), Einletvatnet (Einl), Finnvatnet (Finn),  
876 Gaup-tjern (Gaup), Jula Jávri (Jula), Lakselvhøgda (Laks), Lauvås (Lauv), Øvre Æråsvatnet (Ovre),  
877 Paulan Jávri (Paul), and Rottjern (Rott).

878

879 **S4 Table. Taxa removed during filtering.** All DNA reads that have 100% match to the reference  
880 libraries and have been removed during the second last step of filtering (see Table S2).

881

882 **S5 Table. Retrieval of positive controls from raw Orbitool output file.** The file consisted of  
883 12706536 reads of 581 sequences, 98% match). Note that not all taxa used in the positive controls  
884 were present in the reference library but they match to closely related taxa.

885

886 **S6 Table. The probability of detection in eDNA and vegetation.** The probability that all taxa in the  
887 vegetation were recorded (Vegetation), and that the DNA records represents true and false positives.  
888 Mean probability, standard deviation (SD) are given for each lake.

889

890



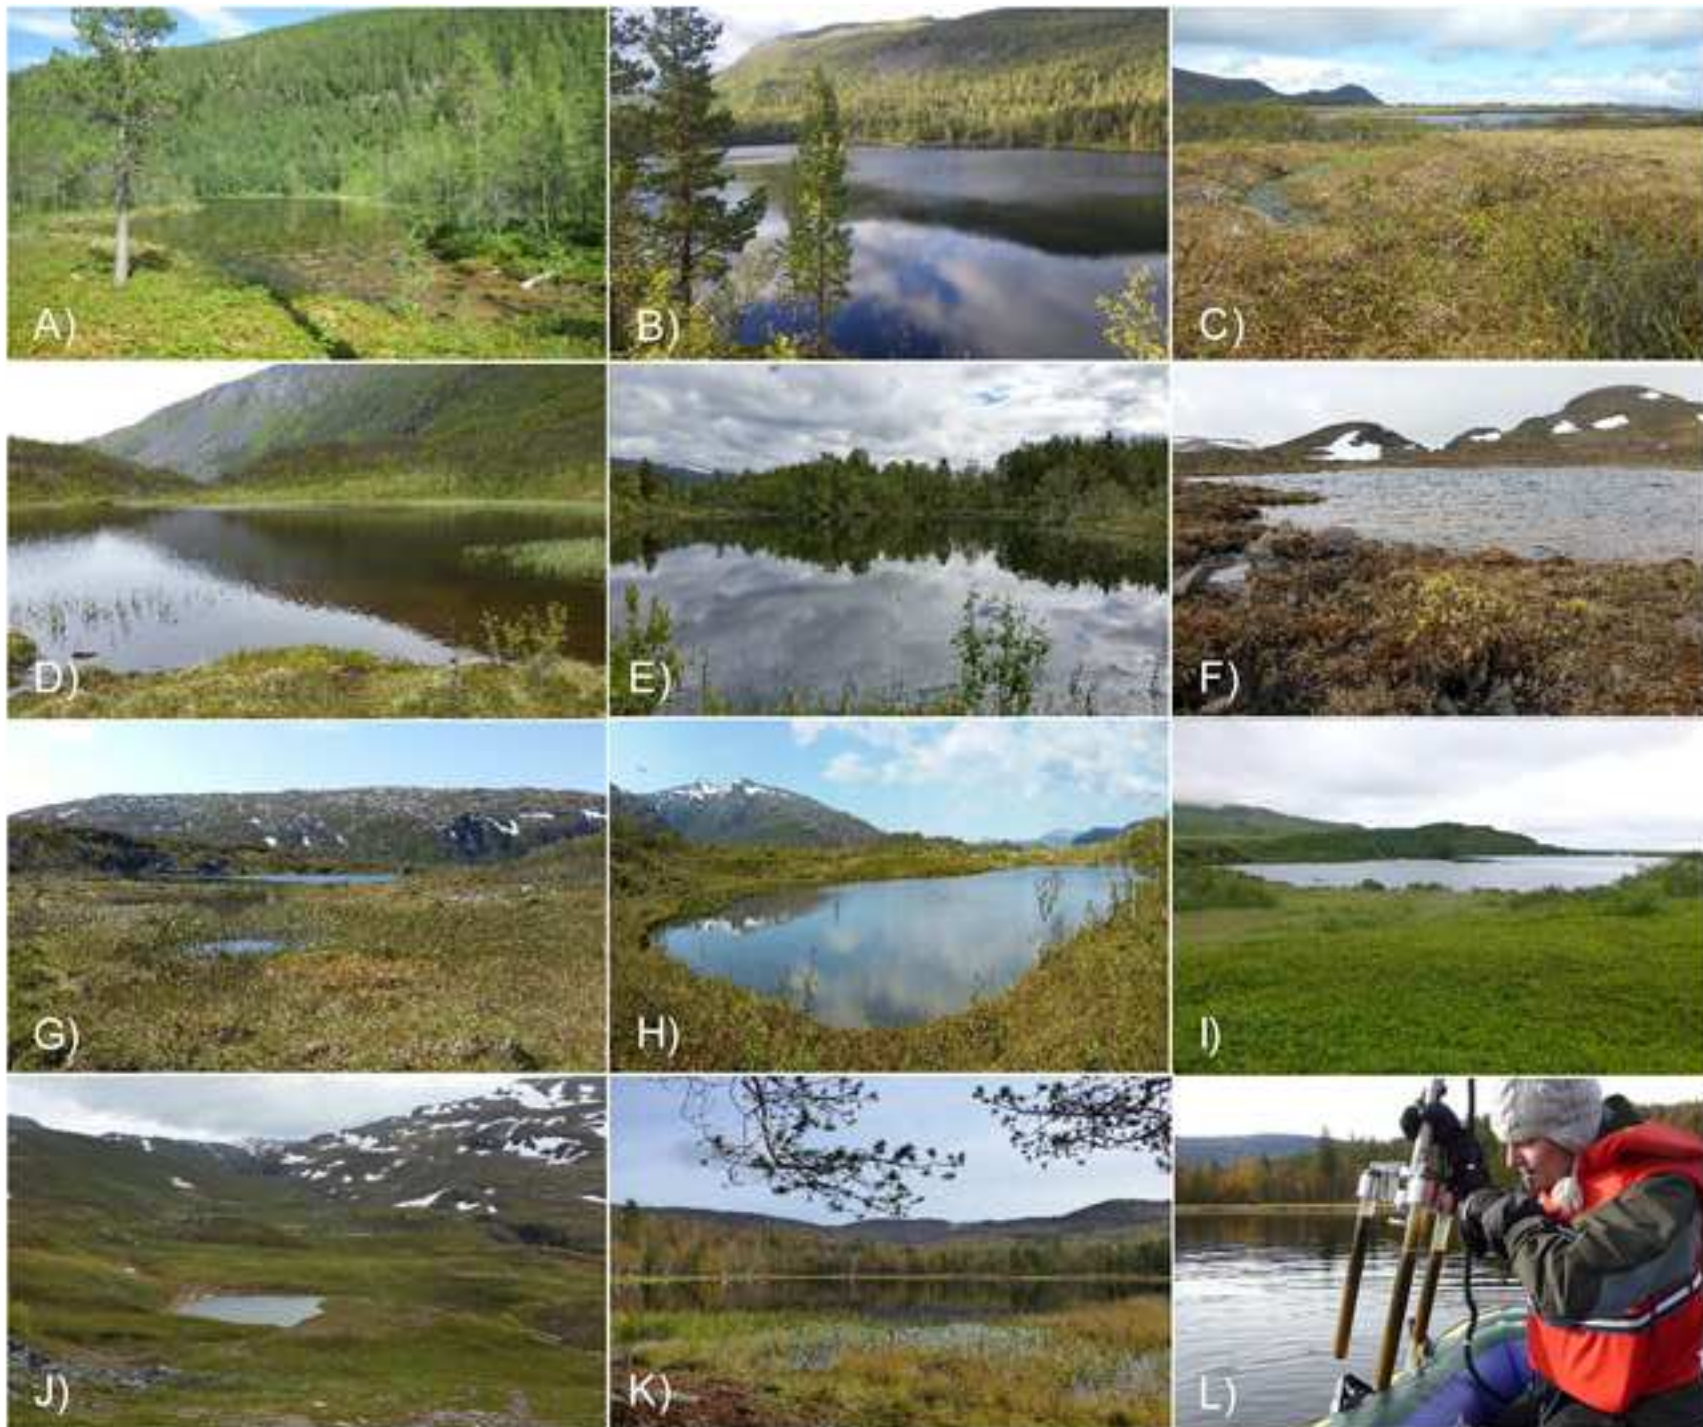

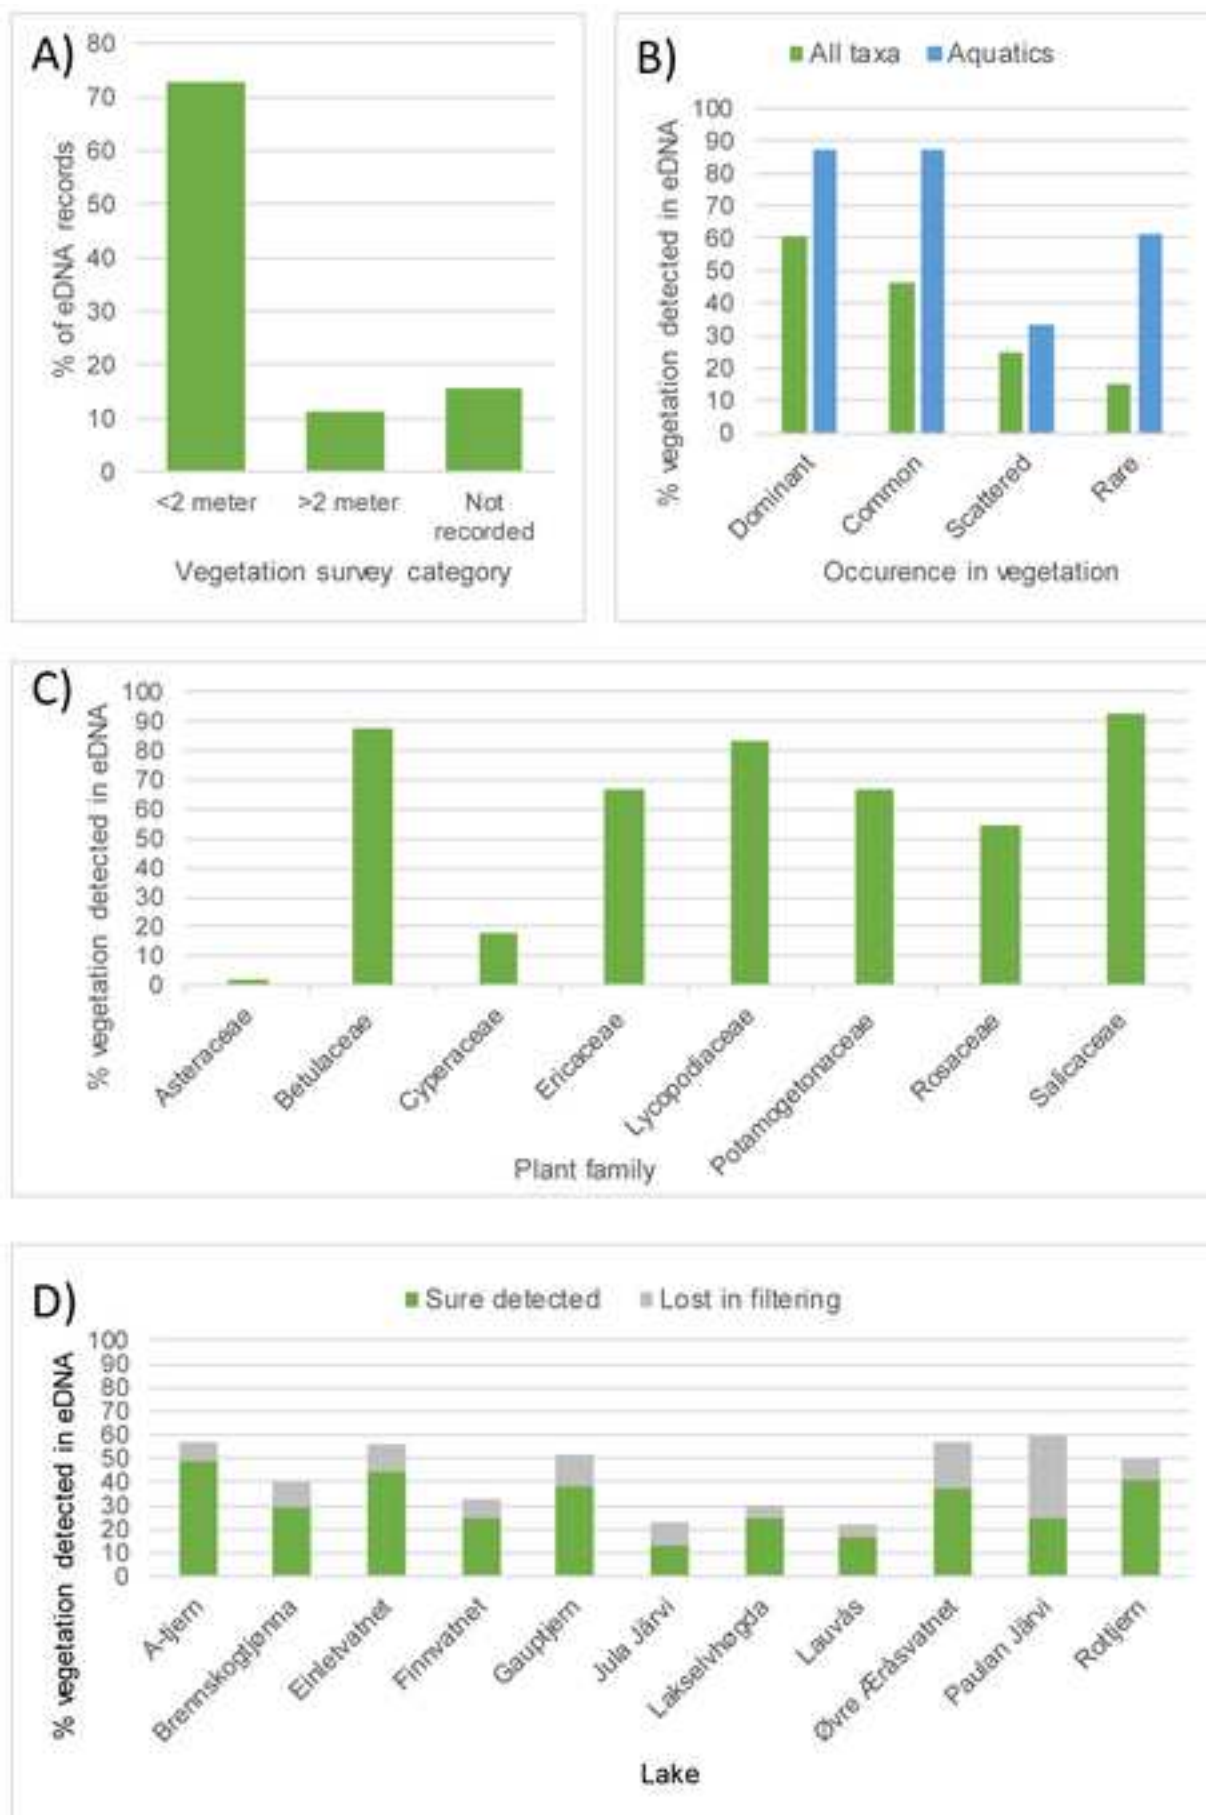

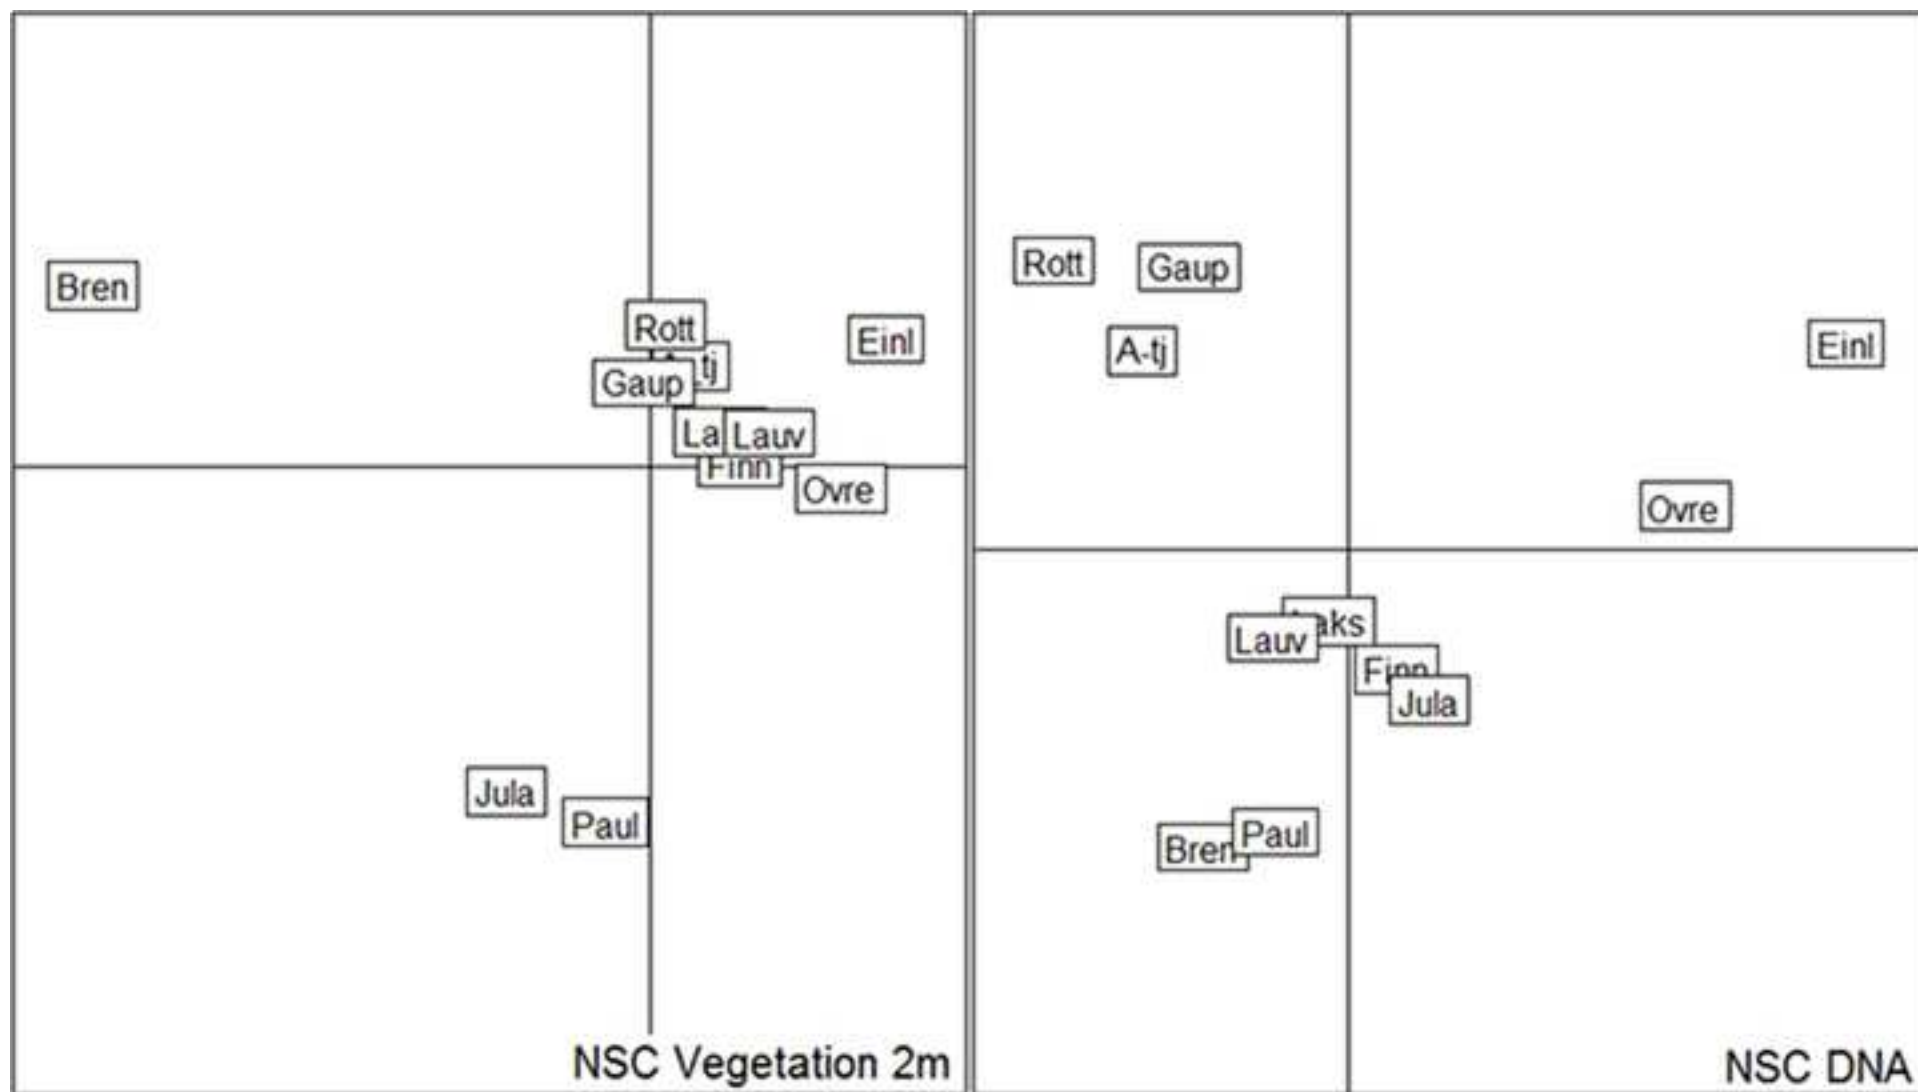

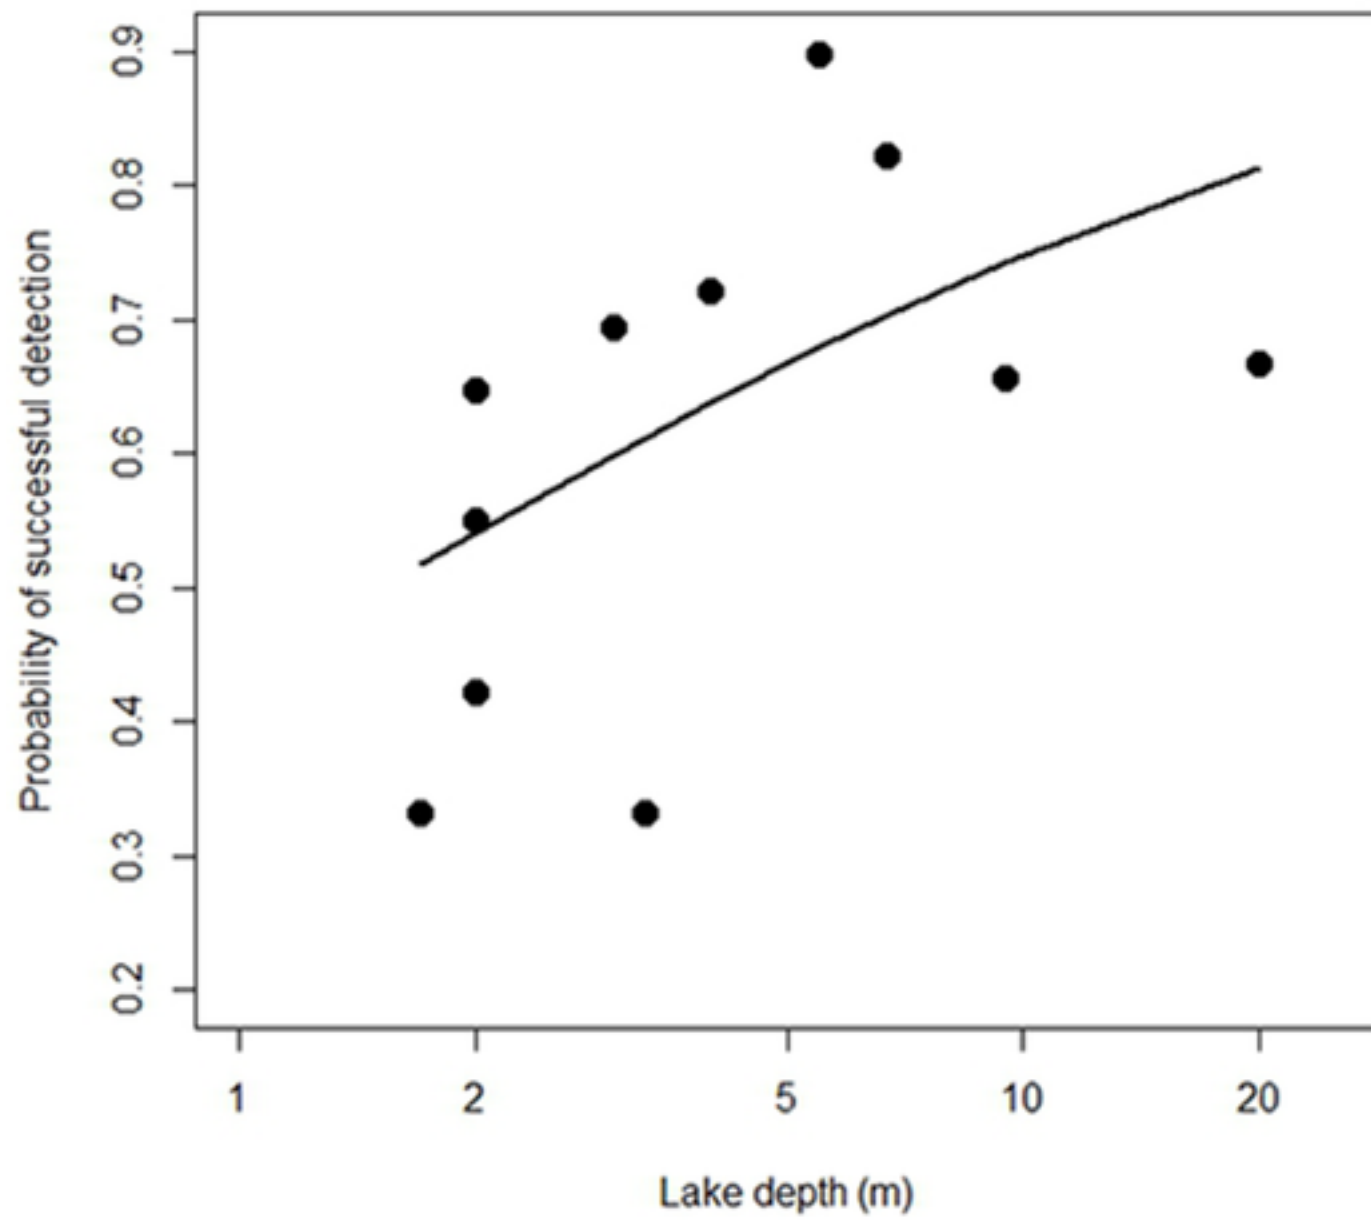

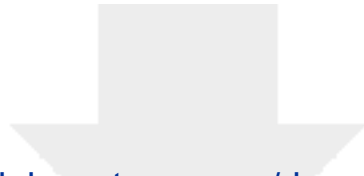

Click here to access/download  
**Supporting Information**  
S1\_Appendix.docx

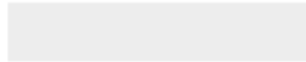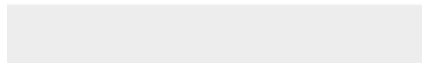



Click here to access/download  
**Supporting Information**  
S1\_Table.docx





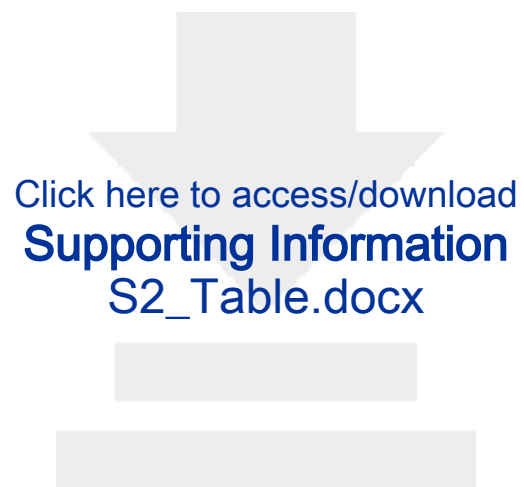

Click here to access/download  
**Supporting Information**  
S2\_Table.docx

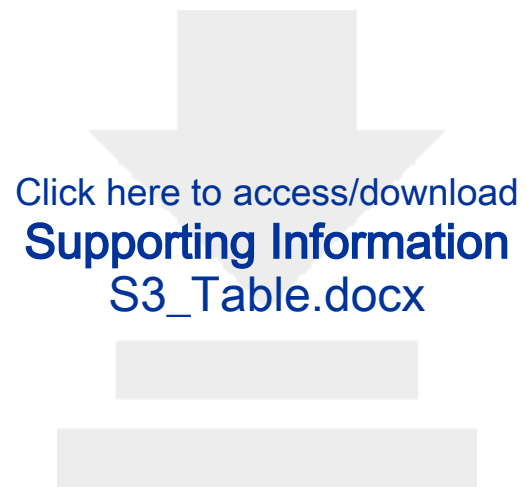

Click here to access/download  
**Supporting Information**  
S3\_Table.docx



Click here to access/download  
**Supporting Information**  
S4\_Table.xlsx



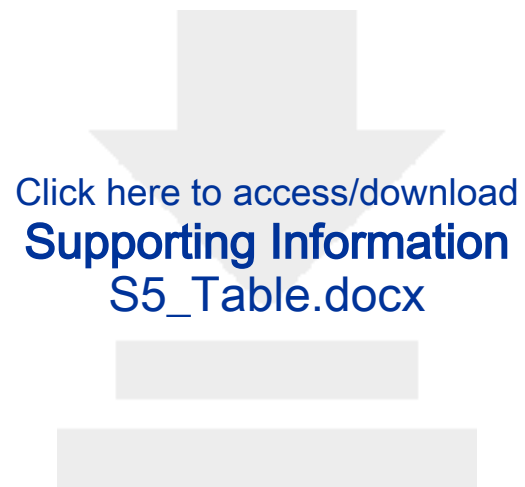

Click here to access/download  
**Supporting Information**  
S5\_Table.docx



Click here to access/download  
**Supporting Information**  
S6\_Table.docx



Source: https://www.biorxiv.org/content/10.1101/264903v1.full.pdf
